# Supplementary material for: Delimiting species of Protaphorura (Collembola: Onychiuridae): integrative evidence based on morphology, DNA sequences and geography
Source: Springer Nature journal article supplement (doi:10.1038/s41598-017-08381-4), 2017-08-09
Supplement: 41598_2017_8381_MOESM1_ESM.pdf [file 41598_2017_8381_MOESM1_ESM.pdf]

## Supplementary information

### **Delimiting species of *Protaphorura* (Collembola: Onychiuridae): integrative evidence based on morphology, DNA sequences and geography**

**Xin Sun**<sup>1,3</sup>, **Feng Zhang**<sup>2,4,\*</sup>, **Yinhuan Ding**<sup>2</sup>, **Thomas W. Davies**<sup>5</sup>, **Yu Li**<sup>3</sup>, **Donghui Wu**<sup>1,\*</sup>

<sup>1</sup> Key Laboratory of Wetland Ecology and Environment, Northeast Institute of Geography and Agroecology, Chinese Academy of Sciences, Changchun 130102, China

<sup>2</sup> Department of Entomology, College of Plant Protection, Nanjing Agricultural University, Nanjing 210095, China

<sup>3</sup> Engineering Research Center of Chinese Ministry of Education for Edible and Medicinal Fungi, Jilin Agricultural University, Changchun 130118, China

<sup>4</sup> Key Laboratory of Zoological Systematics and Evolution, Institute of Zoology, Chinese Academy of Sciences, Beijing 100101, China

<sup>5</sup> Centre for Geography, Environment and Society, University of Exeter, Penryn, Cornwall TR10 9FE, UK

\* Corresponding author; E-mail: xtmt.d.zf@gmail.com, wudonghui@iga.ac.cn

#### **This file includes:**

**Figure S1.** Neighbour-joining tree based on COI for 144 specimens with node bootstrap values and species grouping shown.

**Taxonomy.** Description of the six new species.

**Figure S2.** *Protaphorura liui* Sun & Zhang sp. nov.. (a) Dorsal side of body. (b) Ventral side of head. (c) Ventral side of Abd. II–VI. Scales: 0.1 mm.

**Figure S3.** *Protaphorura liui* Sun & Zhang sp. nov.. (a) Distal part of leg. III. (b) Labium. (c) Postantennal organ, showing the sensory club. (d) Ant. III–IV. Scales: 0.1 mm (a, c, d), 0.01 mm (b).

**Figure S4.** *Protaphorura jiaoheensis* Sun & Zhang sp. nov.. (a) Dorsal side of body. (b) Labium. (c) Ventral side of head. (d) Ventral side of Abd. II–VI. Scales: 0.1 mm (a, c, d), 0.01 mm (b).

**Figure S5.** *Protaphorura jilinensis* Sun & Zhang sp. nov.. (a) Dorsal side of body. (b) Labium. (c) Postantennal organ. (d) Sensory organ of Ant. III. (e) Antenna. (f) Ventral side of Abd. I–VI. Scales: 0.1 mm (a, c, e, f), 0.01 mm (b, d).

**Figure S6.** *Protaphorura jilinensis* Sun & Zhang sp. nov.. (a) Ventral side of head. (b) Distal

part of leg. I. (c) Distal part of leg. III. (d) Th. sternum II. (e) Th. sternum III. (f) Central part of Abd. sternum IV. Scales: 0.1 mm (a, f), 0.01 mm (b–e).

**Figure S7.** *Protaphorura khanka* Sun & Zhang sp. nov.. (a) Dorsal side of body. (b) Ventral side of head. (c) Ventral side of Abd. II–VI. Scales: 0.1 mm.

**Figure S8.** *Protaphorura khanka* Sun & Zhang sp. nov.. (a) Anal valves. (b) Sensory organ of Ant. III. (c) Th. sternum II. (d) Central part of Abd. sternum IV. (e) Distal part of leg. III. Scales: 0.1 mm (a, d, e), 0.01 mm (b–c).

**Figure S9.** *Protaphorura uniseta* Sun & Zhang sp. nov.. (a) Dorsal side of body. (b) Ventral side of head. (c) Ventral side of Abd. II–VI. Scales: 0.1 mm.

**Figure S10.** *Protaphorura uniseta* Sun & Zhang sp. nov.. (a) Dorsal side of Abd. IV–VI. (b) Sensory organ of Ant. III. (c) Distal part of leg. III. Scales: 0.1 mm (a), 0.01 mm (b–c).

**Figure S11.** *Protaphorura zhangae* Sun & Zhang sp. nov.. (a) Dorsal side of body. (b) Sensory organ of Ant. III. (c) Labium. (d) Antenna. (e) Ventral side of Abd. I–VI. Scales: 0.1 mm (a, d, e), 0.01 mm (b–c).

**Figure S12.** *Protaphorura zhangae* Sun & Zhang sp. nov.. (a) Dorsal side of Abd. IV–VI. (b) Ventral side of head. Scales: 0.1 mm.

**Table S1.** Intraspecific divergence.

**Table S2.** Interspecific divergence.

**Table S3.** Molecular analysis information.

**Table S4.** Geographical distances between populations.

**Table S5.** The number of putative species delimited using different distance thresholds.

**Table S6.** The main diagnostic characters of *Protaphourra* from northeast China.

**Table S7.** Comparison and variation of the two new species having dorsal pso formula as 33/012/33342 and ventral psx as 1/000/100001<sup>m</sup>.

**Figure S1. Neighbour-joining tree based on COI for 144 specimens with node bootstrap values and species grouping shown.**

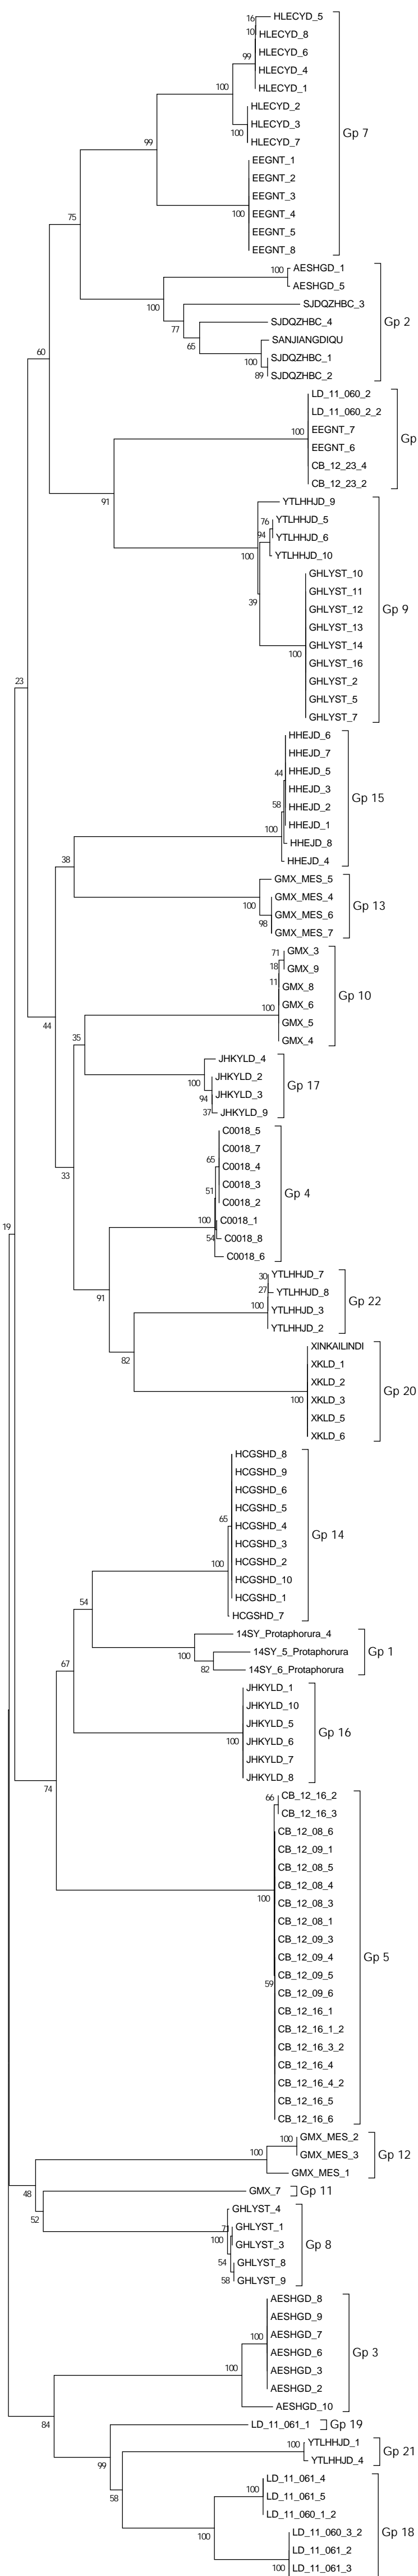

## Taxonomy

Taxonomical description methods:

Labial type is named after Fjellberg<sup>83</sup>. Labial areas and chaetal nomenclature follow Massoud<sup>84</sup> and D'Haese<sup>85</sup>. Chaetae on anal valves are named following Yoshii<sup>86</sup>. Chaetae on the furcal area are classified in accordance with Weiner<sup>87</sup>. The formulae of pseudocelli, parapseudocelli and pseudopores are the number of pseudocelli, parapseudocelli or pseudopores by half-tergum (dorsally) or half-sternum (ventrally) as follows: head anterior, head posterior/Th. I, Th. II, Th. III/Abd. I, Abd. II, Abd. III, Abd. IV, Abd. V (for instance: 32/012/33232). The tibiotarsus chaetotaxy formula follows Deharveng<sup>88</sup> and is expressed as: total number of chaetae and also number of chaetae in whorl A+T, B and basal chaetae, for example: 22 (11, 8, 3).

Abbreviations used in descriptions. Ant.—antennal segments, PAO—postantennal organ, Th.—thoracic segments, Abd.—abdominal segments, ms—microsensillum, pso—pseudocellus, psx—parapseudocellus, psp—pseudopore, <sup>m</sup>—unpaired parapseudocellus and pseudopore, s—sensory chaeta on the body, p-chaeta—chaeta of row p, M chaeta—submedial posterior macrochaeta on Abd. tergum V, sp—posterior s-chaeta on Abd. tergum V, AS—anal spines, s'—additional microchaeta on Abd. terga I–III and V, set above the submedial pso.

### *Protaphorura liui* Sun & Zhang sp. nov.

(Supplementary Figures S2, S3; Supplementary Table S6)

**Type material.** Holotype female, paratypes 9 females, 1 male and 20 juveniles on slides. China: Heilongjiang Province: Jiamusi City: Hancongou town (43.07765° N, 128.01729° E), litter and soil, Berlese extraction, 28.IX.2014, leg. Wu Donghui et al.

**Description.** Body color white in alcohol. Size 1.40–1.55 mm in females, 1.30 mm in male; holotype 1.55 mm. Body slender and elongated.

Pseudocellar formula dorsally: 32/012/33232, ventrally: 10/000/0000 (Fig. S2a–c); subcoxa 1 of legs I–III with 1, 0, 0 pso respectively (Fig. S2a). Parapseudocellar formula ventrally: 1/000/100001<sup>m</sup> (Fig. S2b–c); subcoxa 1 of legs I–III with 1, 1, 1 psx respectively (Fig. S2a). Pseudopores formula dorsally: 00/011/1111, ventrally: 0/111/01<sup>m</sup>1<sup>m</sup>1<sup>m</sup> (Fig. S2a–c).

Head. Antennae nearly as long as head. Ant. IV with subapical organite; basolateral ms above the second proximal row of chaetae (Fig. S3d). Ant. III sensory organ composed of 5 papillae, 5 guard chaetae, 2 small sensory rods, 2 granulated sensory clubs and a lateral ms (Fig. S3d). Ant. II with 17 chaetae. Ant. I with 11 chaetae. Antennal bases with distinct granulation.

PAO composed of 26–36 simple vesicles (Fig. S3c). 4+4 p-chaetae between postero-

internal pso on head (Fig. S2a). Mandible with strong molar plate and 4 apical teeth. Maxilla bearing 3 teeth and 6 lamellae. Maxillary palp simple with 1 basal chaeta and 2 sublobal hairs. Labral chaetae formula 4/342. Labium with 7 proximal, 4 basomedian (E, F, G and f) and 6 basolateral chaetae (a, b, c, d, e, e'); labial type A, papillae A–E respectively with 1, 4, 0, 3, 3 guard chaetae (Fig. S3b). Postlabial chaetae 5+5 along ventral groove (Fig. S2b).

Body chaetotaxy. Dorsal chaetotaxy usually with some asymmetry, well differentiated into macro-, meso- and microchaetae. Chaetae s very weakly marked. Th. terga II–III with ms laterally (Fig. S2a). Th. tergum I with 11+11 chaetae (Fig. S2a). Abd. terga I–III and V without s' (Fig. S2a). Abd. tergum V with p0 axial chaetae, Abd. tergum VI with m0 axial chaeta (Fig. S2a). Ratio M/sp on Abd. V as 2, M/AS as 3 (Fig. S2a). Straight lines passing through the bases of chaetae a1 and m1 parallel on Abd. tergum VI (Fig. S2a). Th. sterna I–III with 1+1, 1+1, 2+2 chaetae respectively. Ventral tube with 8–10+8–10 distal chaetae and 2+2 basal chaetae, without anterior chaetae. Furca reduced to cuticular pocket with 2+2 dental chaetae—1+1 chaetae located on a cuticular fold, remaining 1+1 chaetae located distinctly below fold; three manubrial rows of chaetae present posteriorly to dental chaetae (Fig. S2c). Female genital plate with 17–20 chaetae, male genital chaetae plate with 42 chaetae. Male ventral organ absent. Anal valves with numerous acuminate chaetae; each lateral valve with a0, 2a1 and 2a2; upper valve with chaetae a0, 2a1, 2b1, 2b2, c0, 2c1, 2c2 (Fig. S2c).

Appendages. Subcoxa 1 of legs I–III with 5, 5 and 5 chaetae, subcoxa 2 with 1, 5 and 5 chaetae, respectively. Tibiotarsi of legs I–III with 22 (11, 8, 3), 23 (11, 8, 4) and 23 (11, 8, 4) chaetae, respectively (Fig. S3a). Unguis with small inner denticle. Unguiculus slender and pointed, 1.1 times as long as inner edge of unguis, without inner basal lamella (Fig. S3a). Anal spines set on distinct papillae, about 0.6–0.7 times as long as inner edge of unguis (Fig. S3a).

**Etymology.** The name of the new species refers to the name of the husband of the first author Liu Yunda.

**Ecology.** Found in a broad-leaved forest of the town.

**Remarks.** *Protaphorura liui* sp. nov., *P. changbaiensis* Sun, Zhang & Wu, 2013 and *P. jiaoheensis* sp. nov. (see below) are very similar to each other in the main morphological characters and can be classed to a group with dorsal pso formula as 32/012/33232. However, they are separated easily from each other by the mean genetic distance (0.134 between *P. changbaiensis* and *P. jiaoheensis* sp. nov., 0.130 between *P. changbaiensis* and *P. liui* sp. nov., 0.115 between *P. jiaoheensis* sp. nov. and *P. liui* sp. nov.) (Table S2). Morphologically, they can also be separated by the ventral psx formula (*P. changbaiensis* as 0/000/100001<sup>m</sup> (psx on upper valve is ignored in the original description), *P. liui* sp. nov. as 1/000/100001<sup>m</sup>, *P. jiaoheensis* sp.

nov. as 1/000/110001<sup>m</sup>) (Table S6).

The three-species group has the same pso formula of Abd. I–V terga (33232) as the Crimean species *P. ajudagi* Pomorski, Skarżyński & Kaprus', 1998 and the Mongolian species *P. microcellata* (Dunger, 1978). However, the three-species group differs from *P. ajudagi* by the absence of inner pso on Th. II tergum (present in *P. ajudagi*) and the posterior pso ventrally on head (present in *P. ajudagi*), the shape of sensory clubs on Ant. III sensory organ (smooth in *P. ajudagi*), the presence of chaetae on Th. I–III sterna (absent in *P. ajudagi*) and the absence of the male ventral organ (present in *P. ajudagi*); it can be also distinguished easily from *P. microcellata* by absence of inner pso on Th. II tergum (present in *P. microcellata*) and the presence of pso on subcoxa 1 of leg I (absent in *P. microcellata*).

***Protaphorura jiaoheensis* Sun & Zhang sp. nov.**

(Supplementary Figure S4; Supplementary Table S6)

**Type material.** Holotype female, paratypes 9 females, 7 males and 2 juveniles on slides. China: Jilin Province: Jiaohe City (43.80567° N, 127.17435° E), litter and soil, Berlese extraction, 28.IX.2014, leg. Wu Donghui *et al.*

**Description.** Body color white in alcohol. Size 1.60–1.75 mm in females, 1.40–1.50 mm in males; holotype 1.60 mm. Body slender and elongated.

Pseudocellar formula dorsally: 32/012/33232, ventrally: 10/000/0000 (Fig. S4a, c, d); subcoxa 1 of legs I–III with 1, 0, 0 pso respectively (Fig. S4a). Parapseudocellar formula ventrally: 1/000/110001<sup>m</sup> (Fig. S4c, d); subcoxa 1 of legs I–III with 1, 1, 1 psx respectively. Pseudopores formula dorsally: 00/011/1111, ventrally: 0/111/01<sup>m</sup>1<sup>m</sup>1<sup>m</sup> (Fig. S4a, c, d).

Head. Antennae nearly as long as head. Ant. IV with a subapical organite; basolateral ms above the second proximal row of chaetae. Ant. III sensory organ composed of 5 papillae, 5 guard chaetae, 2 small sensory rods, 2 granulated sensory clubs and a lateral ms. Ant. II with 17 chaetae. Ant. I with 11 chaetae. Antennal bases with distinct granulation.

PAO composed of 26–30 simple vesicles (Fig. S4a). 4+4 p-chaetae between postero-internal pso on head (Fig. S4a). Mandible with strong molar plate and 4 apical teeth. Maxilla bearing 3 teeth and 6 lamellae. Maxillary palp simple with 1 basal chaeta and 2 sublobal hairs. Labral chaetae formula 4/342. Labium with 7 proximal, 4 basomedian (E, F, G and f) and 6 basolateral chaetae (a, b, c, d, e, e'); labial type A, papillae A–E respectively with 1, 4, 0, 3, 3 guard chaetae (Fig. S4b). Postlabial chaetae 5+5 along ventral groove (Fig. S4c).

Body chaetotaxy. Dorsal chaetotaxy usually with some asymmetry, well differentiated into macro-, meso- and microchaetae. Chaetae s very weakly marked. Th. terga II–III with ms

laterally (Fig. S4a). Th. tergum I with 10+10–11 chaetae (Fig. S4a). Abd. terga I–III and V without s' (Fig. S4a). Abd. tergum V with p0 axial chaetae, Abd. tergum VI with m0 axial chaeta (Fig. S4a). Ratio M/sp on Abd. V as 2, M/AS as 3 (Fig. S4a). Straight lines passing through the bases of chaetae a1 and m1 parallel on Abd. tergum VI (Fig. S4a). Th. sterna I–III with 1+1, 1+1, 2+2 chaetae respectively. Ventral tube with 10+10 distal chaetae and 2+2 basal chaetae, without anterior chaetae. Furca reduced to cuticular pocket with 2+2 dental chaetae—1+1 chaetae located on a cuticular fold, remaining 1+1 chaetae located distinctly below fold; three manubrial rows of chaetae present posteriorly to dental chaetae (Fig. S4d). Female genital plate with 18–20 chaetae, male genital chaetae plate with 42–44 chaetae. Male ventral organ absent. Anal valves with numerous acuminate chaetae; each lateral valve with a0, 2a1 and 2a2; upper valve with chaetae a0, 2a1, 2b1, 2b2, c0, 2c1, 2c2 (Fig. S4d).

Appendages. Subcoxa 1 of legs I–III with 5, 5 and 5 chaetae, subcoxa 2 with 1, 5 and 5 chaetae, respectively. Tibiotarsi of legs I–III with 22 (11, 8, 3), 23 (11, 8, 4) and 23 (11, 8, 4) chaetae, respectively. Unguis with small inner denticle. Unguiculus slender and pointed, 1.1 times as long as inner edge of unguis, without inner basal lamella. Anal spines set on distinct papillae, about 0.6 times as long as inner edge of unguis (Fig. S4a).

**Etymology.** The name of the new species refers to locality where it was collected.

**Ecology.** Found in a broad-leaved forest of the city.

**Remarks.** See above remarks on *Protaphorura liui* sp. nov..

### ***Protaphorura jilinensis* Sun & Zhang sp. nov.**

(Supplementary Figures S5, S6; Supplementary Table S3)

**Type material.** Holotype female, paratypes 14 females and 5 males on slides. China: Jilin Province: Changbai Mountain (alt. ca 1700 m, 41.76° N, 127.94° E), litter and soil, Berlese extraction, 15.VIII.2009, leg. Wu Donghui.

**Description.** Body color white in alcohol. Size 2.0–2.2 mm in females, 1.8–1.9 mm in males; holotype 2.0 mm. Body slender and elongated.

Pseudocellar formula dorsally: 33/012/33342, ventrally: 10/000/0000 (Figs S5a, f, S6a); subcoxa 1 of legs I–III with 1, 1, 1 pso respectively (Fig. S5a). Parapseudocellar formula ventrally: 1/000/100001<sup>m</sup> (Figs S5f, S6a); subcoxa 1 of legs I–III with 1, 1, 1 psx respectively (Fig. S5a). Pseudopores formula dorsally: 00/011/1111, ventrally: 0/111/01<sup>m</sup>1<sup>m</sup>1<sup>m</sup> (Figs S5a, f, S6a).

Head. Antennae nearly as long as head. Ant. IV with a subapical organite; basolateral ms above the second proximal row of chaetae. Ant. III sensory organ composed of 5 papillae, 5



guard chaetae, 2 small sensory rods, 2 granulated sensory clubs and a lateral ms (Fig. S5d–e). Ant. II with 18 chaetae. Ant. I with 11 chaetae. Antennal bases with distinct granulation. PAO composed of 30–40 simple vesicles (Fig. S5c). 4+4 p-chaetae between postero-internal pso on head (Fig. S5a). Mandible with strong molar plate and 4 apical teeth. Maxilla bearing 3 teeth and 6 lamellae. Maxillary palp simple with 1 basal chaeta and 2 sublobal hairs. Labral chaetae formula 4/342. Labium with 7 proximal, 4 basomedian (E, F, G and f) and 6 basolateral chaetae (a, b, c, d, e, e’); labial type A, papillae A–E respectively with 1, 4, 0, 3, 3 guard chaetae (Fig. S5b). Postlabial chaetae 5+5 along ventral groove (Fig. S6a).

Body chaetotaxy. Dorsal chaetotaxy usually with some asymmetry, well differentiated into macro-, meso- and microchaetae. Chaetae s very weakly marked. Th. terga II–III with ms laterally (Fig. S5a). Th. tergum I with 12–13+12–13 chaetae (Fig. S5a). Abd. terga I–III and V without s’ (Fig. S5a). Abd. terga IV–V with several asymmetrical chaetae along the axial line, Abd. tergum IV with one or two m0 axial chaetae, Abd. tergum V with p0 axial chaeta, m0 present or not, Abd. tergum VI with m0 axial chaeta (Fig. S5a). Ratio M/sp on Abd. V as 1.4–1.5, M/AS as 3.2–3.5 (Fig. S5a). Straight lines passing through the bases of chaetae a1 and m1 parallel on Abd. tergum VI (Fig. S5a). Th. sterna I–III with 1+1, 1+1, 2+2 chaetae respectively (Fig. S6d–e), rarely 1+2 on Th. sternum II. Ventral tube with 8–11+8–11 distal chaetae and 2+2 basal chaetae, without anterior chaetae (Fig. S5f). Furca reduced to cuticular pocket with 2+2 dental chaetae—1+1 chaetae located on a cuticular fold, remaining 1+1 chaetae located distinctly below fold; three manubrial rows of chaetae present posteriorly to dental chaetae (Figs S5f, S6f). Female genital plate with 20–24 chaetae, male genital chaetae plate with 36–48 chaetae. Male ventral organ absent. Anal valves with numerous acuminate chaetae; each lateral valve with a0, 2a1 and 2a2; upper valve with chaetae a0, 2a1, 2b1, 2b2, c0, 2c1, 2c2 (Fig. S5f).

Appendages. Subcoxa 1 of legs I–III with 5, 7 and 5(6, 7) chaetae, subcoxa 2 with 1, 5 and 5 chaetae, respectively. Tibiotarsi of legs I–III with 22 (11, 8, 3), 24 (11, 8, 5) and 23 (11, 8, 4) chaetae, respectively (Fig. S6c–d). Unguis with small inner denticle. Unguiculus slender and pointed, as long as inner edge of unguis, without inner basal lamella (Fig. S6c–d). Anal spines set on distinct papillae, about 0.6–0.7 times as long as inner edge of unguis (Fig. S5a).

**Etymology.** The name of the new species refers to name of the province where it was collected.

**Ecology.** Found in coniferous forest.

**Remarks.** *Protaphorura jilinensis* sp. nov. is very similar to *P. khanka* sp. nov. (see below) in most morphological characters, but they are separated easily from each other by the mean

0.106 genetic distance (Table S2). After re-examination of fresh and voucher specimens, we found several minor differences between the two species as shown in Table S7, although these characters usually show variations in species.

The two new species have the same dorsal pseudocellar formula (33/012/33342) with the species *P. dzherga* Gulgenova & Potapov, 2013 which is described from Russia. However, the two new species differ from *P. dzherga* by the numbers of pso on subcoxa 1 of legs I–III (1,1,1 in the two new species, absent in *P. dzherga*), the ventral psx formula (1/000/100001<sup>m</sup> in the two new species, 0/000/11000 in *P. dzherga*), and the number of papillae in Ant. III sensory organ (5 in the two new species, 4 in *P. dzherga*).

***Protaphorura khanka* Sun & Zhang sp. nov.**

(Supplementary Figures S7, S8; Supplementary Table S6)

**Type material.** Holotype female, paratypes 14 females and 5 males on slides. China: Heilongjiang Province: Lake Khanka (45.373181° N, 132.332138° E), litter and soil, Berlese extraction, 18.IX.2011, leg. Wu Haitao and Song Lihong.

**Description.** Body color white in alcohol. Size 1.50–1.75 mm in females, 1.30–1.45 mm in males; holotype 1.60 mm. Body slender and elongated.

Pseudocellar formula dorsally: 33/012/33342, ventrally: 10/000/0000 (Fig. S7a–c); subcoxa 1 of legs I–III with 1, 1, 1 pso respectively (Fig. S7a). Parapseudocellar formula ventrally: 1/000/100001<sup>m</sup> (Fig. S7b–c); subcoxa 1 of legs I–III with 1, 1, 1 psx respectively (Fig. S7a). Pseudopores formula dorsally: 00/011/1111, ventrally: 0/111/01<sup>m</sup>1<sup>m</sup>1<sup>m</sup> (Fig. S7a–c).

Head. Antennae nearly as long as head. Ant. IV with a subapical organite; basolateral ms above the second proximal row of chaetae. Ant. III sensory organ composed of 5 papillae, 5 guard chaetae, 2 small sensory rods, 2 granulated sensory clubs and a lateral ms (Fig. S8b). Ant. II with 18 chaetae. Ant. I with 11 chaetae. Antennal bases with distinct granulation.

PAO composed of 30–36 simple vesicles. 4+4 p-chaetae between postero-internal pso on head (Fig. S7a). Mandible with strong molar plate and 4 apical teeth. Maxilla bearing 3 teeth and 6 lamellae. Maxillary palp simple with 1 basal chaeta and 2 sublobal hairs. Labral chaetae formula 4/342. Labium with 7 proximal, 4 basomedian (E, F, G and f) and 6 basolateral chaetae (a, b, c, d, e, e'); labial type A, papillae A–E respectively with 1, 4, 0, 3, 3 guard chaetae. Postlabial chaetae 5–6+5–6 along ventral groove (Fig. S7b).

Body chaetotaxy. Dorsal chaetotaxy usually with some asymmetry, well differentiated into macro-, meso- and microchaetae. Chaetae s very weakly marked. Th. terga II–III with ms

laterally (Fig. S7a). Th. tergum I with 12–13+12–13 chaetae (Fig. S7a). Abd. terga I–III and V without s' (Fig. S7a). Abd. terga IV–V with several asymmetrical chaetae along the axial line, Abd. tergum IV with one or two m0 axial chaetae, Abd. tergum V with p0 axial chaeta, m0 present or not, Abd. tergum VI with m0 axial chaeta (Fig. S7a). Ratio M/sp on Abd. V as 1.5–1.6, M/AS as 3–3.5 (Fig. S7a). Straight lines passing through the bases of chaetae a1 and m1 parallel on Abd. tergum VI (Fig. S7a). Th. sterna I–III with 1+1, 2+2, 2+2 chaetae respectively (Fig. S8c), rarely 1+2 or 1+1 on Th. sternum II. Ventral tube with 10–13+10–13 distal chaetae and 2+2 basal chaetae, without anterior chaetae. Furca reduced to cuticular pocket with 2+2 dental chaetae—1+1 chaetae located on a cuticular fold, remaining 1+1 chaetae located distinctly below fold; three manubrial rows of chaetae present posteriorly to dental chaetae (Fig. S8d). Female genital plate with 22–26 chaetae, male genital chaetae plate with 28–34 chaetae. Male ventral organ absent. Anal valves with numerous acuminate chaetae; each lateral valve with a0, 2a1 and 2a2; upper valve with chaetae a0, 2a1, 2b1, 2b2, c0, 2c1, 2c2 (Fig. S8a).

Appendages. Subcoxa 1 of legs I–III with 5, 7(6) and 5 chaetae, subcoxa 2 with 1, 5 and 5 chaetae, respectively. Tibiotarsi of legs I–III with 22–23 (11, 8, 4(3)), 24 (11, 8, 5) and 23 (11, 8, 4) chaetae, respectively (Fig. S8e). Unguis with small inner denticle. Unguiculus slender and pointed, as long as inner edge of unguis, without inner basal lamella (Fig. S8e). Anal spines set on distinct papillae, about 0.6 times as long as inner edge of unguis (Fig. S7a).

**Etymology.** The name of the new species refers to locality where it was collected.

**Ecology.** Found in coniferous and broad-leaved mixed forest.

**Remarks.** See above remarks on *Protaphorura jilinensis* sp. nov.

### ***Protaphorura uniseta* Sun & Zhang sp. nov.**

(Supplementary Figures S9, S10; Supplementary Table S6)

**Type material.** Holotype female, paratypes 1 female and 2 males on slides. China: Heilongjiang Province: Lesser Khingan Tree Farm (49.058176° N, 127.074391° E), litter, Berlese extraction, 1.VII.2011, leg. Sun Xin et al.

**Other material.** 2 females on slides. China: Inner Mongolia: Hulun Buir: Ergun City (50.12214° N, 120.20458° E), soil, Berlese extraction, 23. IX. 2014, leg. Li Jiujia.

**Description.** Body color white in alcohol. Size 2.1–2.2 mm in females, 1.6–1.7 mm in males; holotype 2.1 mm. Body slender and elongated.

Pseudocellar formula dorsally: 33/022/33342, ventrally: 10/000/0000 (Fig. S9a–c); subcoxa 1 of legs I–III with 1, 1, 1 pso respectively (Fig. S9a). Parapseudocellar formula ventrally: 1/000/111101<sup>m</sup> (Fig. S9c); subcoxa 1 of legs I–III with 1, 1, 1 psx respectively (Fig.

S9a). Pseudopores formula dorsally: 00/011/1111, ventrally: 0/111/01<sup>m</sup>1<sup>m</sup>1<sup>m</sup> (Fig. S9a–c).

Head. Antennae nearly as long as head. Ant. IV with a subapical organite; basolateral ms above the second proximal row of chaetae. Ant. III sensory organ composed of 5 papillae, 5 guard chaetae, 2 small sensory rods, 2 granulated sensory clubs and a lateral ms (Fig. S10b). Ant. II with 16–17 chaetae. Ant. I with 11 chaetae. Antennal bases with distinct granulation.

PAO composed of 34–40 simple vesicles. 4+4 p-chaetae between postero-internal pso on head (Fig. S9a). Mandible with strong molar plate and 4 apical teeth. Maxilla bearing 3 teeth and 6 lamellae. Maxillary palp simple with 1 basal chaeta and 2 sublobal hairs. Labral chaetae formula 4/342. Labium with 7 proximal, 4 basomedian (E, F, G and f) and 6 basolateral chaetae (a, b, c, d, e, e') (Fig. S9b); labial type A, papillae A–E respectively with 1, 4, 0, 3, 3 guard chaetae. Postlabial chaetae 5+5 along ventral groove (Fig. S9b).

Body chaetotaxy. Dorsal chaetotaxy usually with some asymmetry, well differentiated into macro-, meso- and microchaetae. Chaetae s very weakly marked. Th. terga II–III with ms laterally (Fig. S9a). Th. tergum I with 12–14+12–14 chaetae (Fig. S9a). Abd. terga I–III and V without s' (Fig. S9a). Abd. terga IV–V with several asymmetrical chaetae along the axial line, Abd. tergum IV with one or two m0 axial chaetae, Abd. tergum V with m0 and p0 axial chaetae, Abd. tergum VI with m0 axial chaeta (Figs S9a, S10a). Ratio M/sp on Abd. V as 1.4, M/AS as 2.5 (Figs S9a, S10a). Straight lines passing through the bases of chaetae a1 and m1 parallel on Abd. tergum VI (Figs S9a, S10a). Th. sterna I–III with 1+1, 1+1, 2+2 chaetae respectively. Ventral tube with 9–10+9–10 distal chaetae and 2+2 basal chaetae, without anterior chaetae. Furca reduced to cuticular pocket with 2+2 dental chaetae—1+1 chaetae located on a cuticular fold, remaining 1+1 chaetae located distinctly below fold; three manubrial rows of chaetae present posteriorly to dental chaetae (Fig. S9c). Female genital plate with 25 chaetae, male genital chaetae plate with 34–40 chaetae. Male ventral organ absent. Anal valves with numerous acuminate chaetae; each lateral valve with a0, 2a1 and 2a2; upper valve with chaetae a0, 2a1, 2b1, 2b2, c0, 2c1, 2c2 (Fig. S9c).

Appendages. Subcoxa 1 of legs I–III with 6, 6–7 and 5–6 chaetae, subcoxa 2 with 1, 5 and 5 chaetae, respectively. Tibiotarsi of legs I–III with 22 (11, 8, 3), 24 (11, 8, 5) and 23 (11, 8, 4) chaetae, respectively (Fig. S10c). Unguis with small inner denticle. Unguiculus slender and pointed, as long as inner edge of unguis, without inner basal lamella (Fig. S10c). Anal spines set on distinct papillae, about 0.6–0.7 times as long as inner edge of unguis (Fig. S9a).

**Etymology.** The name of the new species refers to having only one ventral mesothoracic chaeta on each side.

**Ecology.** Found in broad-leaved forest.

**Remarks.** *Protaphorura uniseta* sp. nov. and *P. zhangae* sp. nov. (see below) belong to the species group which has the dorsal pso formula 33/022/33342 (Sun *et al.*, 2015). *P. uniseta* sp. nov. is most similar to *P. boedvarssoni* Pomorski, 1993 in having the same psx formula; but they can be recognized easily by the number of ventral mesothoractic chaetae (1+1 in the new species and 2+2 in *P. boedvarssoni*) and the presence of chaeta s' on Abd. terga I–III (absent in the new species and present in *P. boedvarssoni*).

***Protaphorura zhangae* Sun & Zhang sp. nov.**

(Supplementary Figures S11, S12; Supplementary Table S6)

**Type material.** Holotype female, paratypes 4 females and 9 males on slides. China: Inner Mongolia: Honghuaerji City (48.13709° N, 119.76073° E), litter, Berlese extraction, 22.IX.2014, leg. Li Jiujiu.

**Description.** Body color white in alcohol. Size 1.78–1.80 mm in females, 1.5–1.7 mm in males; holotype 1.80 mm. Body slender and elongated.

Pseudocellar formula dorsally: 33/022/33342, ventrally: 10/000/0000 (Figs S11a, e, S12b); subcoxa 1 of legs I–III with 1, 1, 1 pso respectively (Fig. S11a). Parapseudocellar formula ventrally: 1/000/110101<sup>m</sup> (Figs S11e, S12b); subcoxa 1 of legs I–III with 1, 1, 1 psx respectively (Fig. S11a). Pseudopores formula dorsally: 00/011/1111, ventrally: 0/111/01<sup>m</sup>1<sup>m</sup>1<sup>m</sup> (Figs S11a, e, S12b).

Head. Antennae nearly as long as head. Ant. IV with a subapical organite; basolateral ms above the second proximal row of chaetae. Ant. III sensory organ composed of 5 papillae, 5 guard chaetae, 2 small sensory rods, 2 granulated sensory clubs and a lateral ms (Fig. S11b). Ant. II with 17 chaetae. Ant. I with 11 chaetae. Antennal bases with distinct granulation.

PAO composed of 24–30 simple vesicles. 4+4 p-chaetae between postero-internal pso on head (Fig. S11a). Mandible with strong molar plate and 4 apical teeth. Maxilla bearing 3 teeth and 6 lamellae. Maxillary palp simple with 1 basal chaeta and 2 sublobal hairs. Labral chaetae formula 4/342. Labium with 7 proximal, 4 basomedian (E, F, G and f) and 6 basolateral chaetae (a, b, c, d, e, e') (Fig. S12b); labial type A, papillae A–E respectively with 1, 4, 0, 3, 3 guard chaetae (Fig. S11c). Postlabial chaetae 5+5 along ventral groove (Fig. S12b).

Body chaetotaxy. Dorsal chaetotaxy usually with some asymmetry, well differentiated into macro-, meso- and microchaetae. Chaetae s very weakly marked. Th. terga II–III with ms laterally (Fig. S11a). Th. tergum I with 12+12 chaetae (Fig. S11a). Abd. terga I–III and V without s' (Figs S11a, S12a). Abd. terga IV–V with several asymmetrical chaetae along the axial line, Abd. tergum IV with m0 axial chaeta, Abd. tergum V with m0 and p0 axial chaetae,

Abd. tergum VI with m0 axial chaeta (Figs S11a, S12a). Ratio M/sp on Abd. V as 1.8–2.0, M/AS as 3 (Figs S11a, S12a). Straight lines passing through the bases of chaetae a1 and m1 parallel on Abd. tergum VI (Figs S11a, S12a). Th. sterna I–III with 1+1, 1+1, 2+2 chaetae respectively. Ventral tube with 11–12+11–12 distal chaetae and 2+2 basal chaetae, without anterior chaetae. Furca reduced to cuticular pocket with 2+2 dental chaetae—1+1 chaetae located on a cuticular fold, remaining 1+1 chaetae located distinctly below fold; three manubrial rows of chaetae present posteriorly to dental chaetae (Fig. S11e). Female genital plate with 20–21 chaetae, male genital chaetae plate with 48 chaetae. Male ventral organ absent. Anal valves with numerous acuminate chaetae; each lateral valve with a0, 2a1 and 2a2; upper valve with chaetae a0, 2a1, 2b1, 2b2, c0, 2c1, 2c2 (Fig. S11e).

Appendages. Subcoxa 1 of legs I–III with 5, 5 and 5 chaetae, subcoxa 2 with 1, 5 and 5 chaetae, respectively. Tibiotarsi of legs I–III with 23 (11, 8, 4), 24 (11, 8, 5) and 23 (11, 8, 4) chaetae, respectively. Unguis with small inner denticle. Unguiculus slender and pointed, as long as inner edge of unguis, without inner basal lamella. Anal spines set on distinct papillae, about 0.6 times as long as inner edge of unguis (Fig. S11a).

**Etymology.** The name of the new species is in memory of Professor Zhang Xueping who was an excellent ecologist from Harbin Normal University.

**Ecology.** Found in broad-leaved forest.

**Remarks.** *P. zhangae* sp. nov. belongs to the species group which has the dorsal psx formula 33/022/33342 (Sun *et al.*, 2015). However, *P. zhangae* sp. nov. differs from *P. uniseta* sp. nov., *P. taimyrica* (Martynova, 1976), *P. boedvarssoni* Pomorski, 1993 and *P. stogovi* Pomorski, 1993 as having different psx formula (1/000/110101<sup>m</sup> in *P. zhangae* sp. nov., 1/000/111101<sup>m</sup> in *P. uniseta* sp. nov. and *P. boedvarssoni*, 1/000/110001<sup>m</sup> in *P. taimyrica* and *P. stogovi*); it can also be separated from *P. montana* (Mateos & Arbea, 1986), *P. paranemorata* (Selga, 1962), *P. quercetana* (Mateos & Arbea, 1986), *P. spinoidea* (Steiner, 1955), *P. subnemorata* (Gisin, 1957) and *P. zori* (Martynova, 1975) by the relative position of prespinal microchaetae on Abd. tergum VI (parallel in *P. zhangae* sp. nov. and convergent in the latter ones), and from *P. sensillata* (Khanislamova, 1986) by the presence of chaeta s' on Abd. tergum V (absent in *P. zhangae* sp. nov. and present in *P. sensillata*).

## References

1. Fjellberg, A. The labial palp in Collembola. *Zool. Anz.* **237**, 309–330 (1999).
2. Massoud, Z. Monographie des Neanuridae, Collemboles Poduromorphes à pièces buccales modifiées. *Biol. Am. Australe* **3**, 7–399 (1967).

3. D'Haese, C. A. Homology and morphology in Poduromorpha (Hexapoda, Collembola). *Eur. J. Entomol.* **101**, 385–407 (2003).
4. Yoshii, R. Identity of some Japanese Collembola IV. “*Deuteraphorura*” group of *Onychiurus* - continued. *Ann. Speleol. Res. Inst. Japan* **14**, 1–15 (1996).
5. Weiner, W. M. Generic revision of Onychiurinae (Collembola: Onychiuridae) with a cladistic analysis. *Ann. Entomol. Soc. Fr.* **32**, 163–200 (1996).
6. Deharveng, L. Morphologie évolutive des Collemboles Neanurinae en particulier de la lignée Neanurienne. *Trav. Lab. Ecobiol. Arthropodes Edaphiques, Toulouse* **4(2)**, 1–63 (1983).

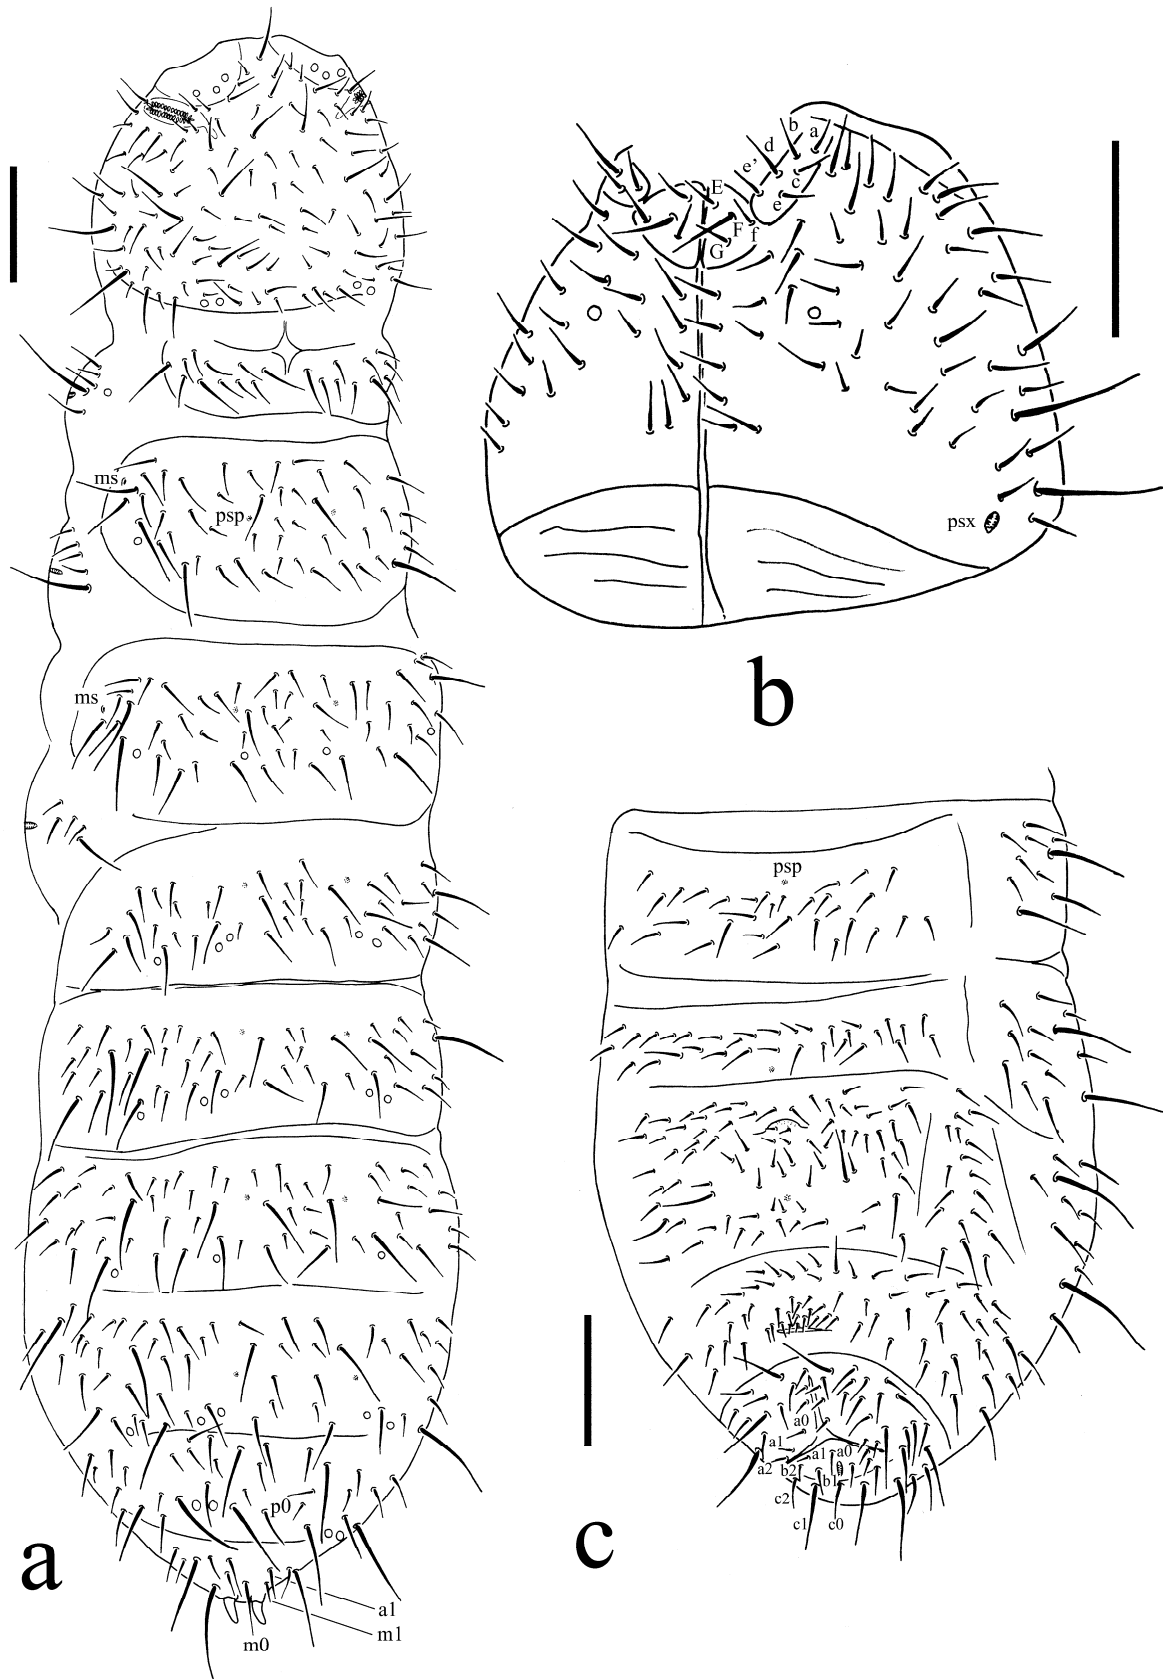

**Figure S2.** *Protaphorura liui* Sun & Zhang sp. nov.. (a) Dorsal side of body. (b) Ventral side of head. (c) Ventral side of Abd. II–VI. Scales: 0.1 mm.



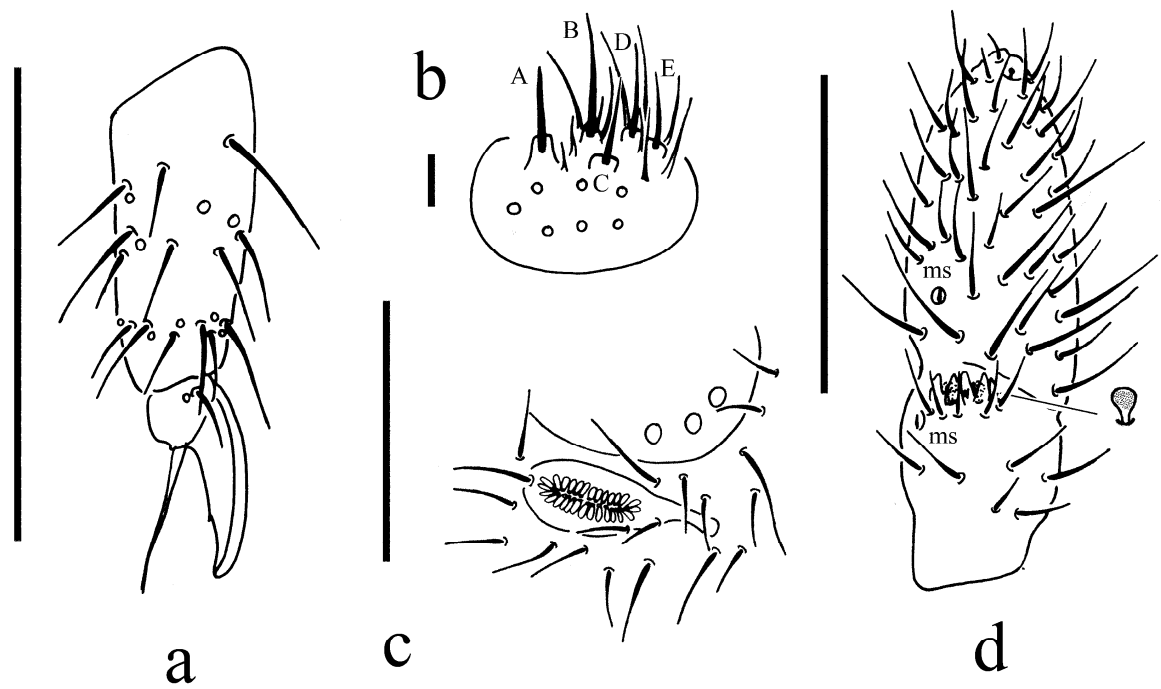

**Figure S3.** *Protaphorura liui* Sun & Zhang sp. nov.. (a) Distal part of leg. III. (b) Labium. (c) Postantennal organ, showing the sensory club. (d) Ant. III–IV. Scales: 0.1 mm (a, c, d), 0.01 mm (b).

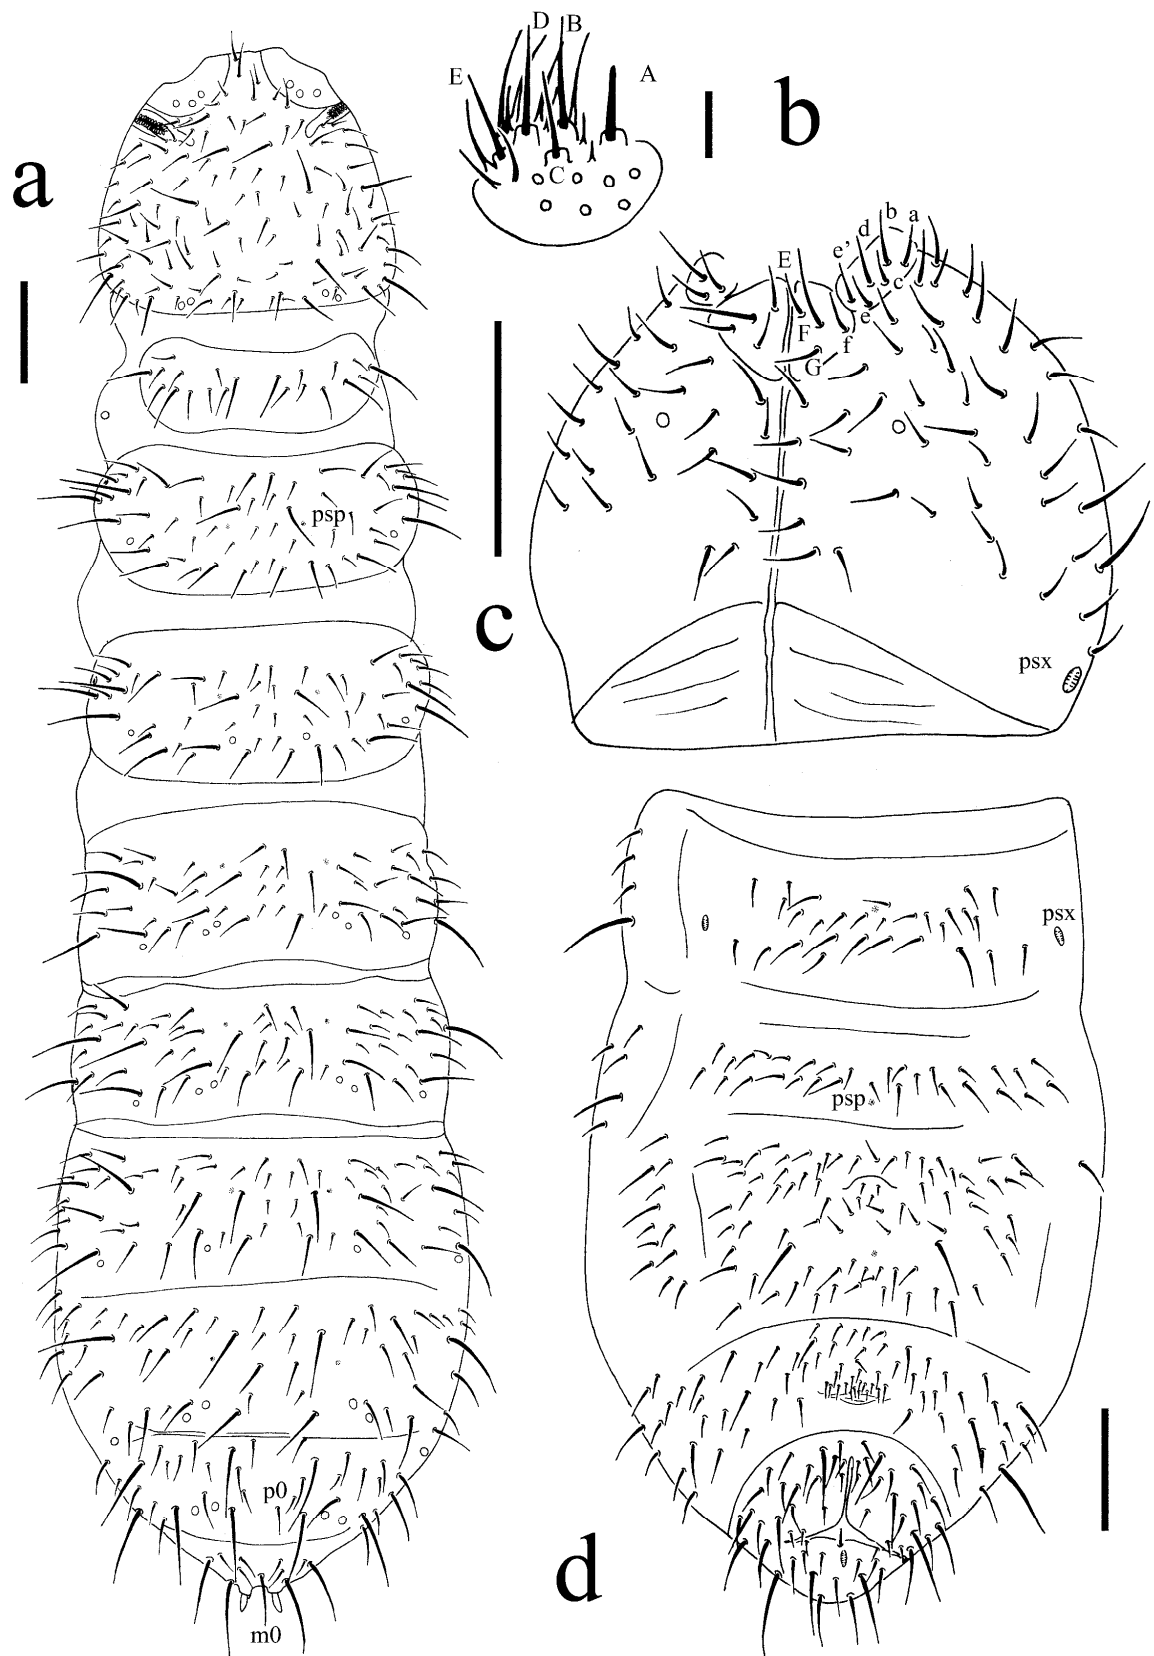

**Figure S4.** *Protaphorura jiaoheensis* Sun & Zhang sp. nov.. (a) Dorsal side of body. (b) Labium. (c) Ventral side of head. (d) Ventral side of Abd. II–VI. Scales: 0.1 mm (a, c, d), 0.01 mm (b).

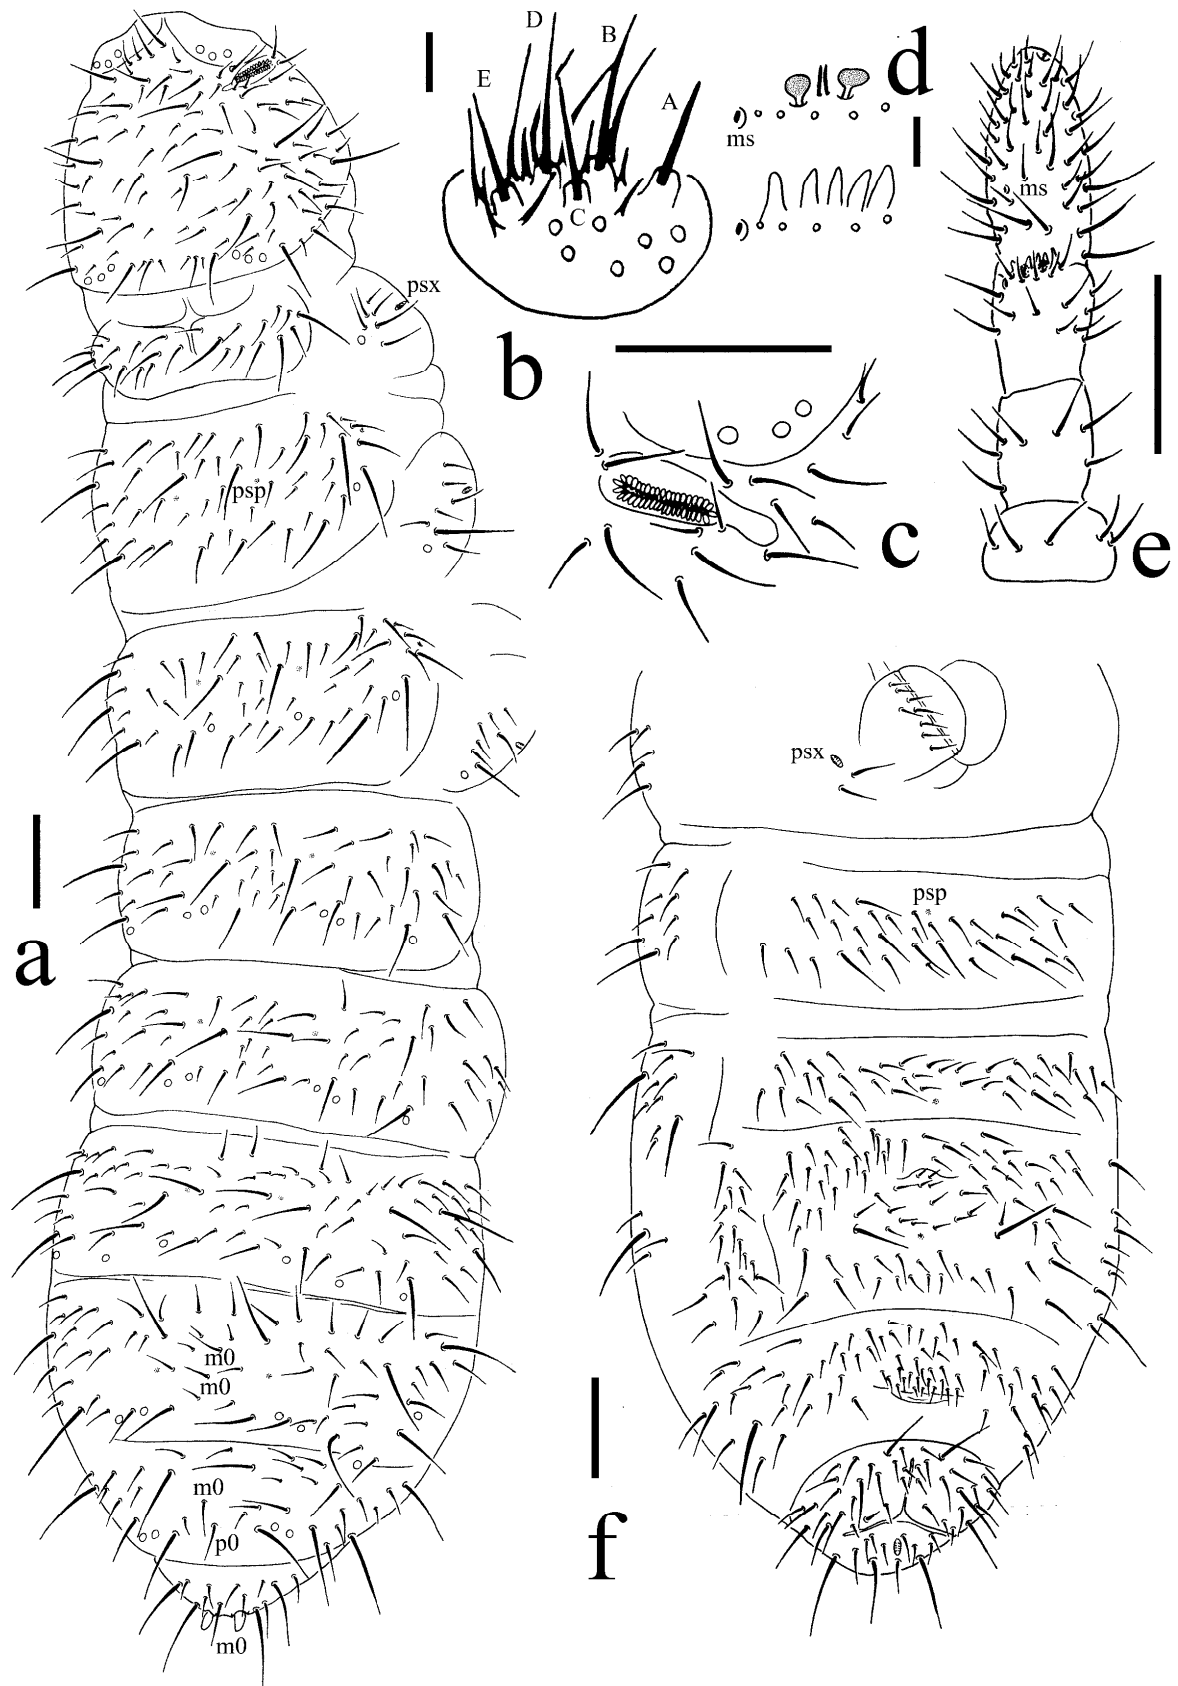

**Figure S5.** *Protaphorura jilinensis* Sun & Zhang sp. nov.. (a) Dorsal side of body. (b) Labium. (c) Postantennal organ. (d) Sensory organ of Ant. III. (e) Antenna. (f) Ventral side of Abd. I–VI. Scales: 0.1 mm (a, c, e, f), 0.01 mm (b, d).

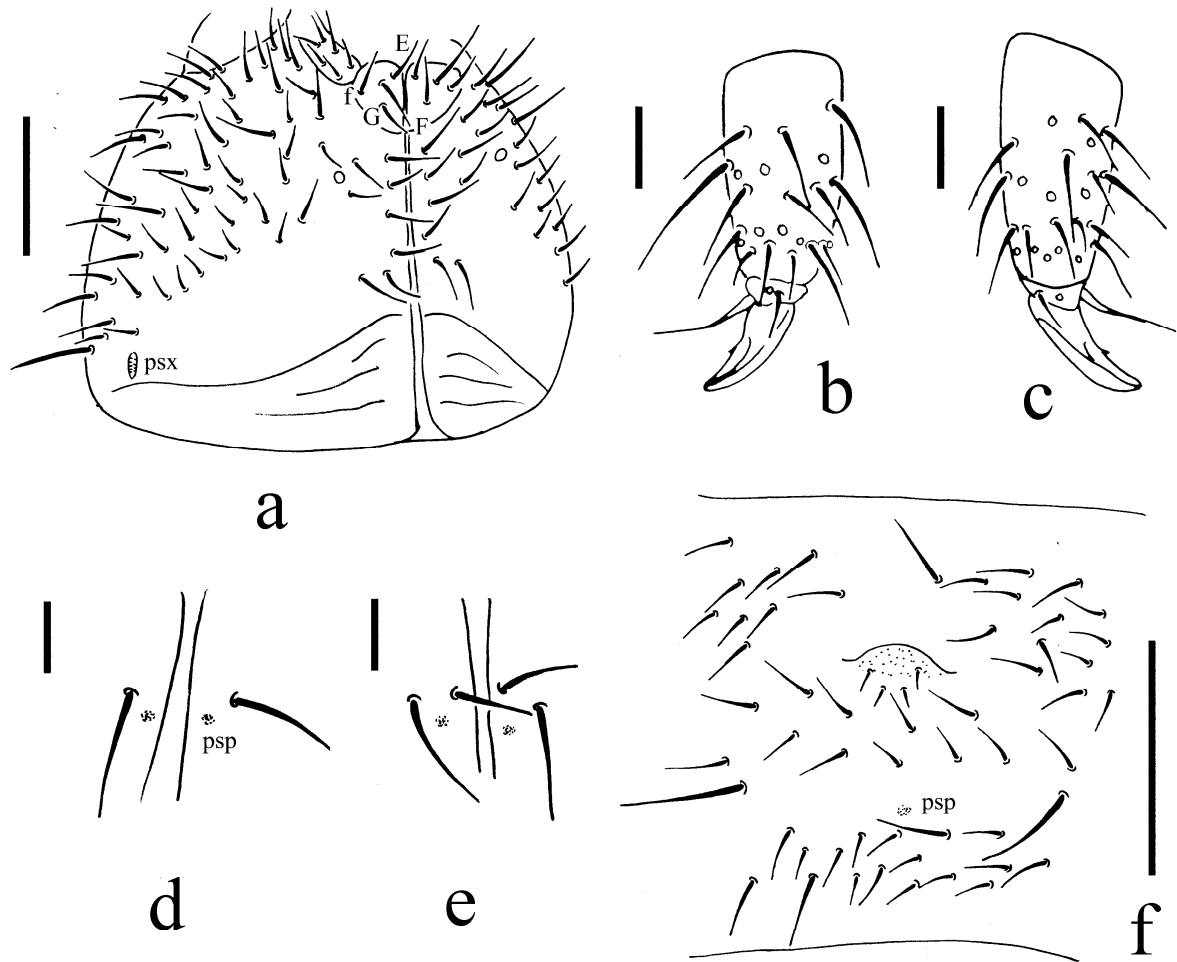

**Figure S6.** *Protaphorura jilinensis* Sun & Zhang sp. nov.. (a) Ventral side of head. (b) Distal part of leg. I. (c) Distal part of leg. III. (d) Th. sternum II. (e) Th. sternum III. (f) Central part of Abd. sternum IV. Scales: 0.1 mm (a, f), 0.01 mm (b–e).

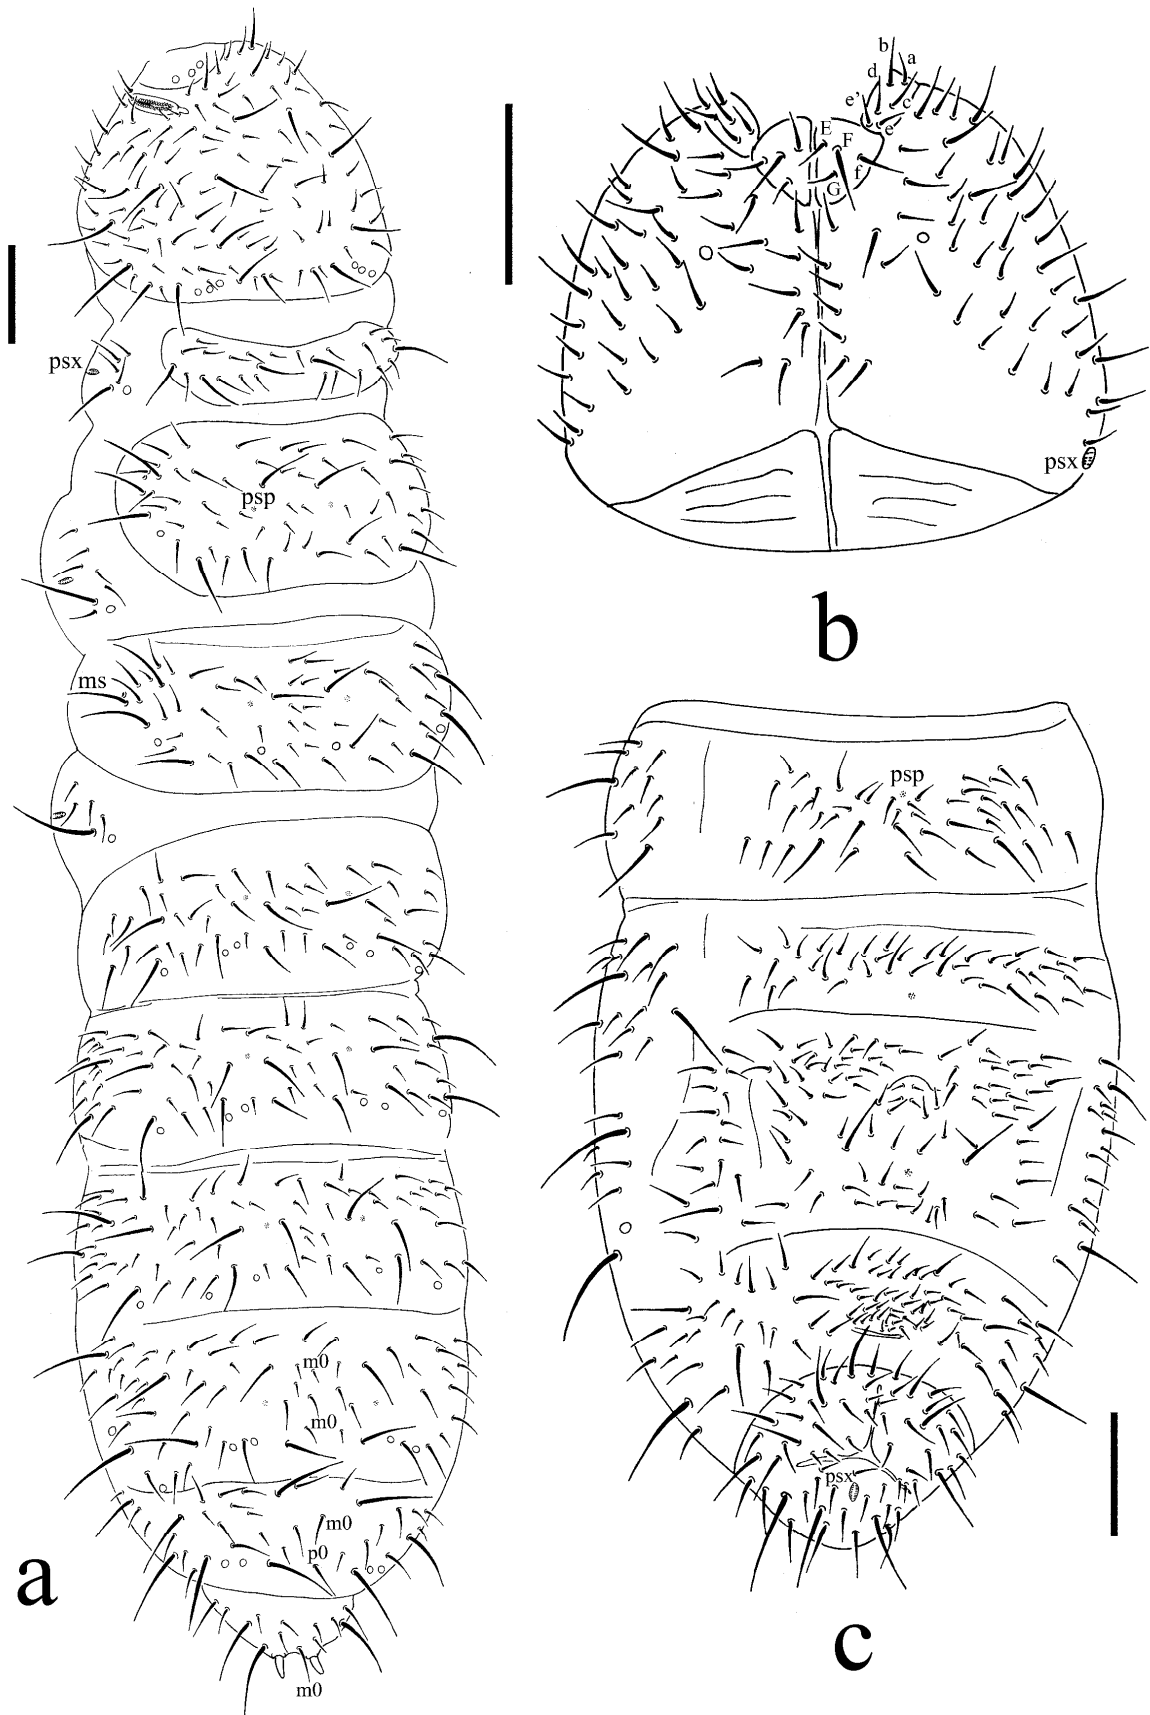

**Figure S7.** *Protaphorura khanka* Sun & Zhang sp. nov.. (a) Dorsal side of body. (b) Ventral side of head. (c) Ventral side of Abd. II–VI. Scales: 0.1 mm.

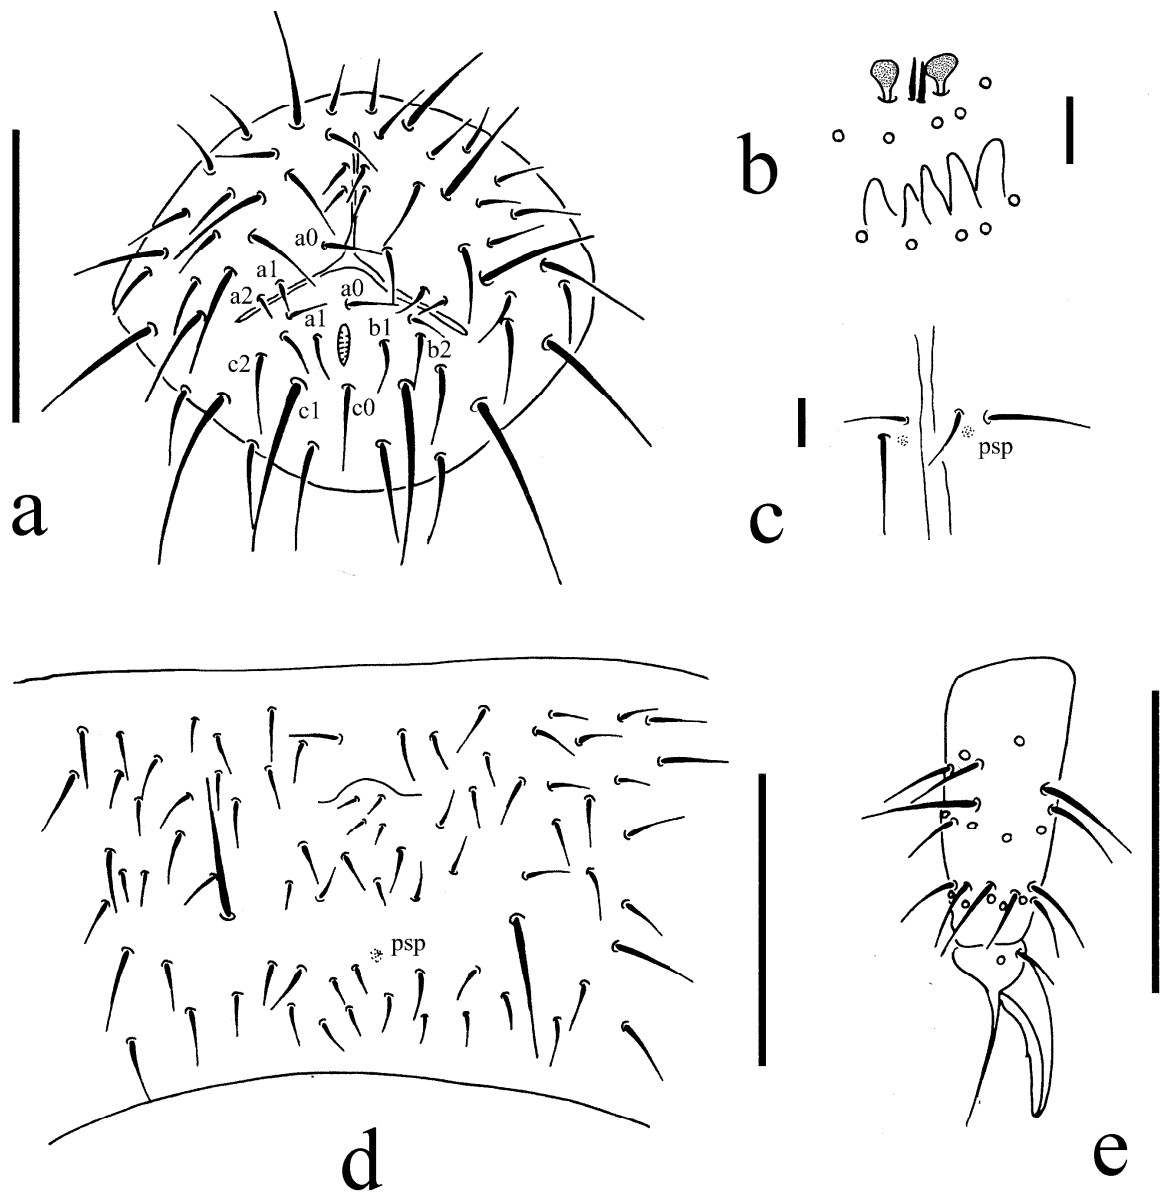

**Figure S8.** *Protaphorura khanka* Sun & Zhang sp. nov.. (a) Anal valves. (b) Sensory organ of Ant. III. (c) Th. sternum II. (d) Central part of Abd. sternum IV. (e) Distal part of leg. III. Scales: 0.1 mm (a, d, e), 0.01 mm (b–c).

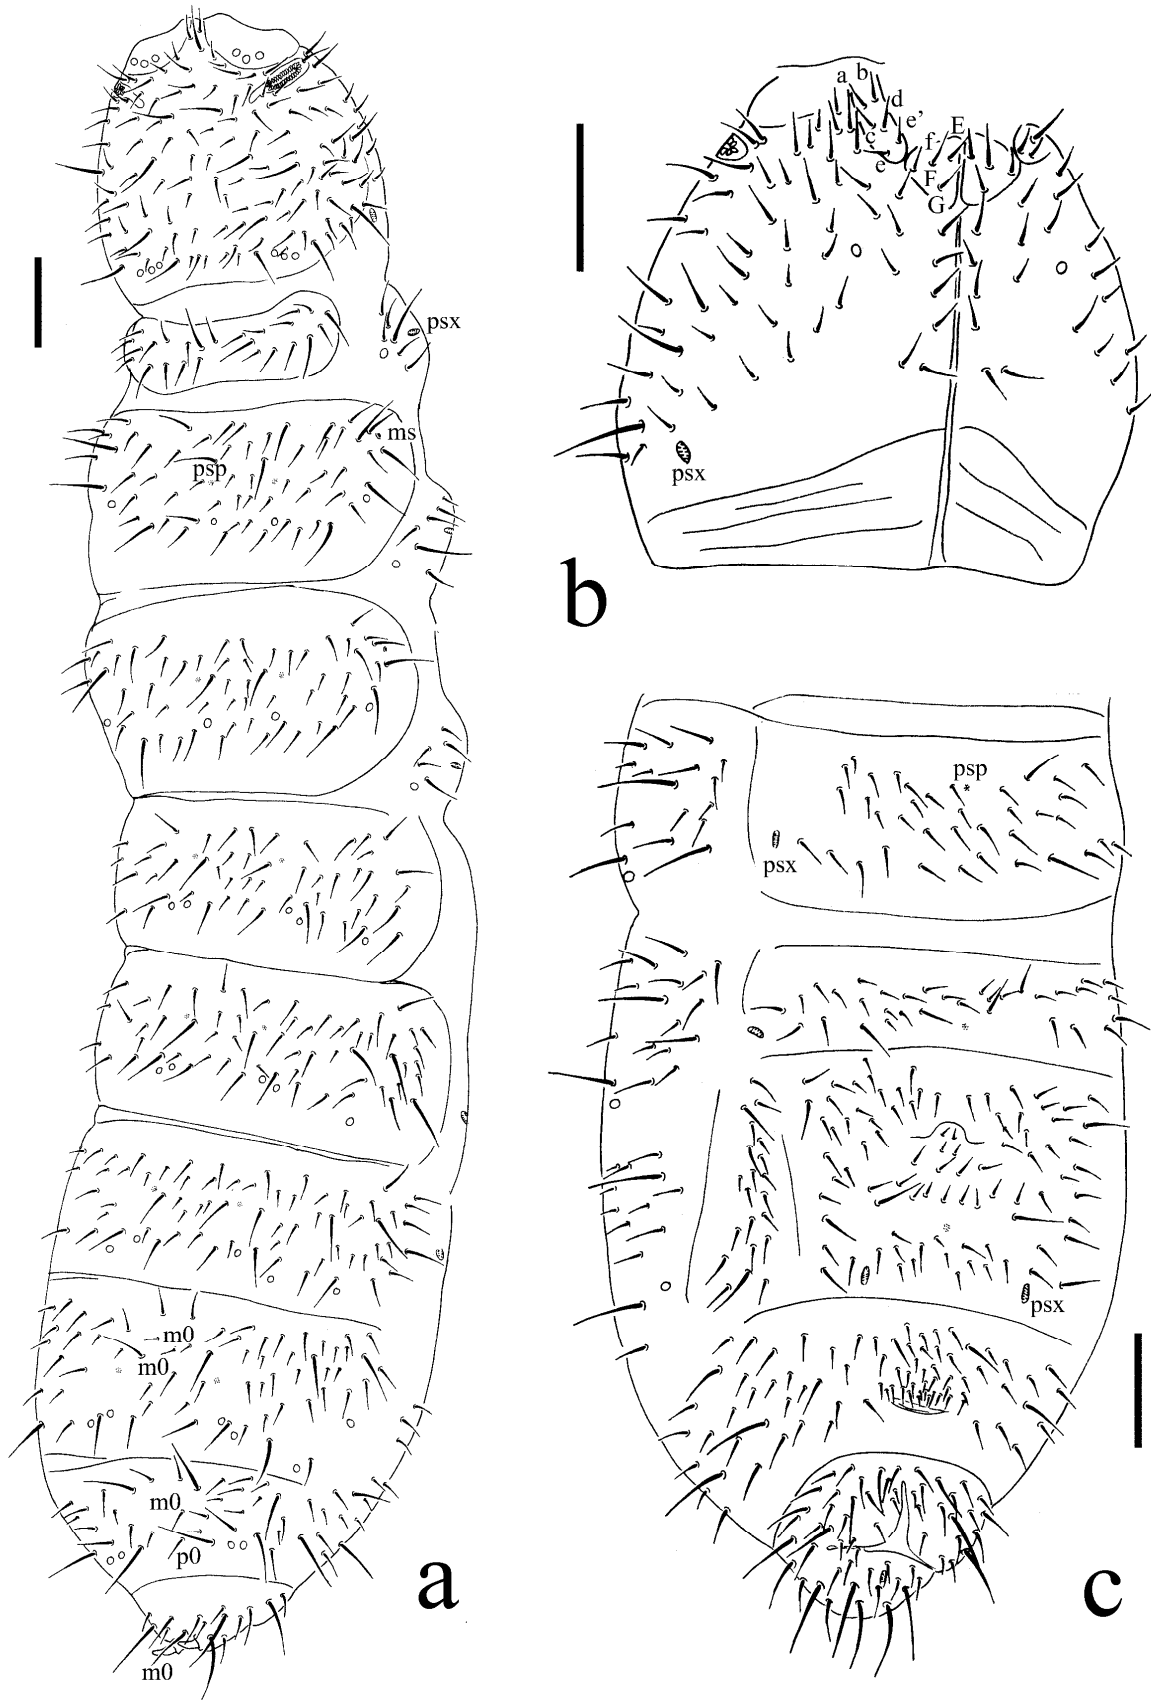

**Figure S9.** *Protaphorura uniseta* Sun & Zhang sp. nov.. (a) Dorsal side of body. (b) Ventral side of head. (c) Ventral side of Abd. II–VI. Scales: 0.1 mm.

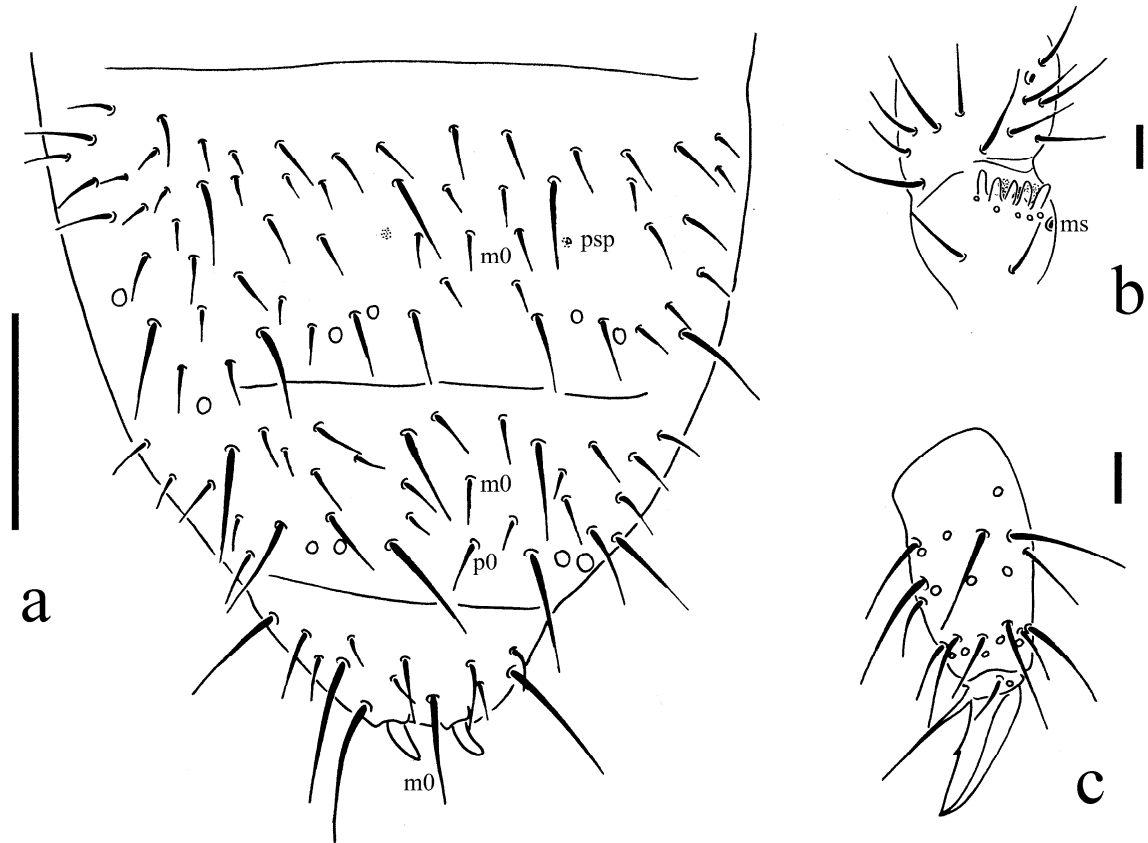

**Figure S10.** *Protaphorura uniseta* Sun & Zhang sp. nov.. (a) Dorsal side of Abd. IV–VI. (b) Sensory organ of Ant. III. (c) Distal part of leg. III. Scales: 0.1 mm (a), 0.01 mm (b–c).



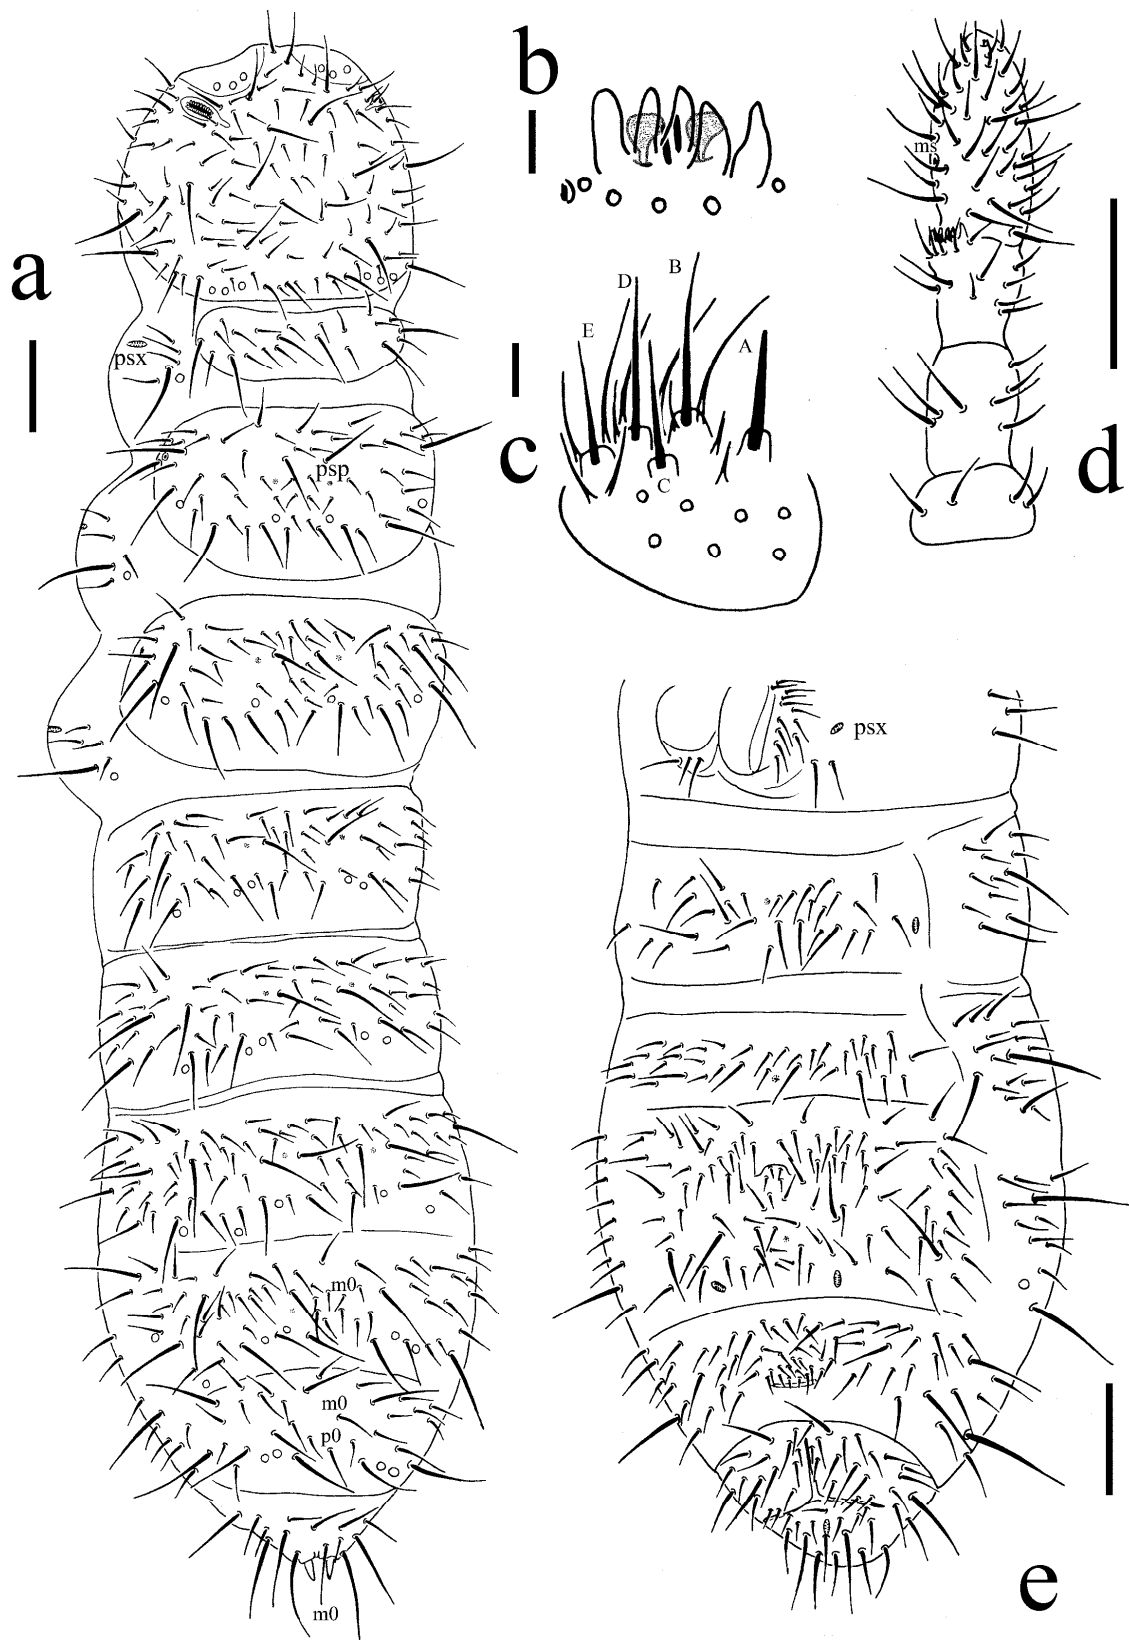

**Figure S11.** *Protaphorura zhangae* Sun & Zhang sp. nov.. (a) Dorsal side of body. (b) Sensory organ of Ant. III. (c) Labium. (d) Antenna. (e) Ventral side of Abd. I–VI. Scales: 0.1 mm (a, d, e), 0.01 mm (b–c).

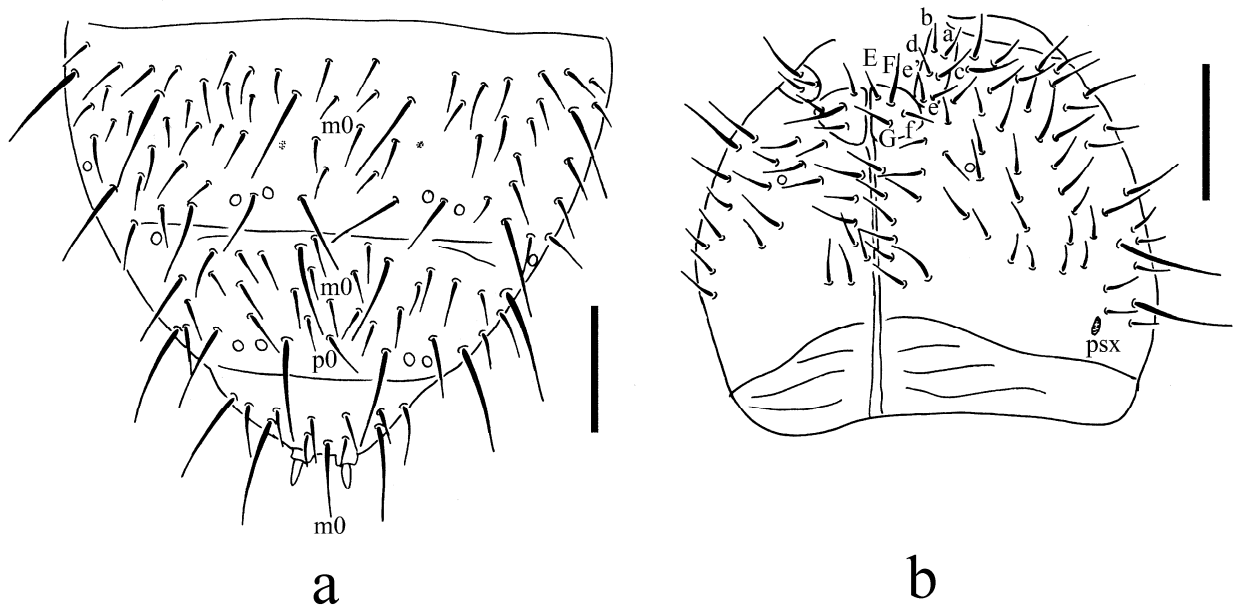

**Figure S12.** *Protaphorura zhangae* Sun & Zhang sp. nov.. (a) Dorsal side of Abd. IV–VI. (b) Ventral side of head. Scales: 0.1 mm.

**Table S1 Intraspecific divergence**

|       |             |         |
|-------|-------------|---------|
| Gp 1  | 0.027637643 |         |
| Gp 2  | 0.058821314 | maximum |
| Gp 3  | 0.005283276 |         |
| Gp 4  | 0.001960938 |         |
| Gp 5  | 0.000302519 |         |
| Gp 6  | 0           |         |
| Gp 7  | 0.034818682 |         |
| Gp 8  | 0.001523001 |         |
| Gp 9  | 0.009937169 |         |
| Gp 10 | 0.000811462 |         |
| Gp 11 | n/c         |         |
| Gp 12 | 0.011319116 |         |
| Gp 13 | 0.003823571 |         |
| Gp 14 | 0.000304298 |         |
| Gp 15 | 0.000761202 |         |
| Gp 16 | 0           |         |
| Gp 17 | 0.003814978 |         |
| Gp 18 | 0.023312314 |         |
| Gp 19 | n/c         |         |
| Gp 20 | 0           |         |
| Gp 21 | 0.001522071 |         |
| Gp 22 | 0.000760746 |         |



**Table S3. Molecular analysis information**

| ID            | Group | Species                                    | Coordinate                 | GenBank accession number | Voucher specimen | Dorsal pso formula checked after the molecular analysis |
|---------------|-------|--------------------------------------------|----------------------------|--------------------------|------------------|---------------------------------------------------------|
| HLECYD_5      | Gp 7  | <i>P. cf. bicampata</i> (Gisin, 1956)      | 49.10684° N 119.74769 E    | KU508196                 | +                | 33/022/33332                                            |
| HLECYD_6      | Gp 7  | <i>P. cf. bicampata</i> (Gisin, 1956)      | 49.10684° N 119.74769 E    | KU508197                 | +                | 33/022/33332                                            |
| HLECYD_1      | Gp 7  | <i>P. cf. bicampata</i> (Gisin, 1956)      | 49.10684° N 119.74769 E    | KU508192                 | -                | -                                                       |
| HLECYD_8      | Gp 7  | <i>P. cf. bicampata</i> (Gisin, 1956)      | 49.10684° N 119.74769 E    | KU508199                 | +                | 33/022/33332                                            |
| HLECYD_4      | Gp 7  | <i>P. cf. bicampata</i> (Gisin, 1956)      | 49.10684° N 119.74769 E    | KU508195                 | -                | -                                                       |
| HLECYD_2      | Gp 7  | <i>P. cf. bicampata</i> (Gisin, 1956)      | 49.10684° N 119.74769 E    | KU508193                 | -                | -                                                       |
| HLECYD_3      | Gp 7  | <i>P. cf. bicampata</i> (Gisin, 1956)      | 49.10684° N 119.74769 E    | KU508194                 | +                | 33/022/33332                                            |
| HLECYD_7      | Gp 7  | <i>P. cf. bicampata</i> (Gisin, 1956)      | 49.10684° N 119.74769 E    | KU508198                 | +                | 33/022/33332                                            |
| EEGNT_1       | Gp 7  | <i>P. cf. bicampata</i> (Gisin, 1956)      | 50.12214° N 120.20458° E   | KU508138                 | +                | 33/022/33332                                            |
| EEGNT_2       | Gp 7  | <i>P. cf. bicampata</i> (Gisin, 1956)      | 50.12214° N 120.20458° E   | KU508139                 | +                | 33/022/33332                                            |
| EEGNT_3       | Gp 7  | <i>P. cf. bicampata</i> (Gisin, 1956)      | 50.12214° N 120.20458° E   | KU508140                 | +                | 33/022/33332                                            |
| EEGNT_4       | Gp 7  | <i>P. cf. bicampata</i> (Gisin, 1956)      | 50.12214° N 120.20458° E   | KU508141                 | +                | 33/022/33332                                            |
| EEGNT_5       | Gp 7  | <i>P. cf. bicampata</i> (Gisin, 1956)      | 50.12214° N 120.20458° E   | KU508142                 | +                | 33/022/33332                                            |
| EEGNT_8       | Gp 7  | <i>P. cf. bicampata</i> (Gisin, 1956)      | 50.12214° N 120.20458° E   | KU508145                 | +                | 33/022/33332                                            |
| AESHGD_1      | Gp 2  | <i>P. cf. bicampata</i> (Gisin, 1956)      | 47.510519° N 120.635001° E | KU508100                 | -                | -                                                       |
| AESHGD_5      | Gp 2  | <i>P. cf. bicampata</i> (Gisin, 1956)      | 47.510519° N 120.635001° E | KU508104                 | +                | 33/022/33332+3                                          |
| SJDQZHBC_3    | Gp 2  | <i>P. cf. bicampata</i> (Gisin, 1956)      | 47.719336° N 133.584393° E | KU508223                 | +                | 33/022/33332                                            |
| SJDQZHBC_4    | Gp 2  | <i>P. cf. bicampata</i> (Gisin, 1956)      | 47.719336° N 133.584393° E | KU508224                 | -                | -                                                       |
| SANJIANGDIQU  | Gp 2  | <i>P. cf. bicampata</i> (Gisin, 1956)      | 47.719336° N 133.584393° E | KU508220                 | -                | -                                                       |
| SJDQZHBC_1    | Gp 2  | <i>P. cf. bicampata</i> (Gisin, 1956)      | 47.719336° N 133.584393° E | KU508221                 | +                | 33/022/33332                                            |
| SJDQZHBC_2    | Gp 2  | <i>P. cf. bicampata</i> (Gisin, 1956)      | 47.719336° N 133.584393° E | KU508222                 | +                | 33/022/33332                                            |
| LD_11_060_2   | Gp 6  | <i>P. uniseta</i> sp. nov.                 | 49.058176° N 127.074391° E | KU508211                 | -                | -                                                       |
| LD_11_060_2_2 | Gp 6  | <i>P. uniseta</i> sp. nov.                 | 49.058176° N 127.074391° E | KU508212                 | +                | 33/022/33342                                            |
| EEGNT_7       | Gp 6  | <i>P. uniseta</i> sp. nov.                 | 50.12214° N 120.20458° E   | KU508144                 | +                | 33/022/33342                                            |
| EEGNT_6       | Gp 6  | <i>P. uniseta</i> sp. nov.                 | 50.12214° N 120.20458° E   | KU508143                 | +                | 33/022/33342                                            |
| CB_12_23_4    | Gp 6  | <i>P. uniseta</i> sp. nov.                 | 42.40093° N 128.10677° E   | KU508137                 | -                | -                                                       |
| CB_12_23_2    | Gp 6  | <i>P. uniseta</i> sp. nov.                 | 42.40093° N 128.10677° E   | KU508136                 | -                | -                                                       |
| YTLHHJD_9     | Gp 9  | <i>P. genheensis</i> Sun, Chang & Wu, 2015 | 50.69010° N 121.71912° E   | KU508240                 | +                | 33/012/33342                                            |
| YTLHHJD_5     | Gp 9  | <i>P. genheensis</i> Sun, Chang & Wu, 2015 | 50.69010° N 121.71912° E   | KU508236                 | +                | 33/012/33342                                            |
| YTLHHJD_6     | Gp 9  | <i>P. genheensis</i> Sun, Chang & Wu, 2015 | 50.69010° N 121.71912° E   | KU508237                 | +                | 33/012/33342                                            |
| YTLHHJD_10    | Gp 9  | <i>P. genheensis</i> Sun, Chang & Wu, 2015 | 50.69010° N 121.71912° E   | KU508232                 | +                | 33/012/33342                                            |
| GHLYST_10     | Gp 9  | <i>P. genheensis</i> Sun, Chang & Wu, 2015 | 50.72447° N 121.49123 E    | KU508147                 | -                | -                                                       |
| GHLYST_11     | Gp 9  | <i>P. genheensis</i> Sun, Chang & Wu, 2015 | 50.72447° N 121.49123 E    | KU508148                 | +                | 33/012/33342                                            |
| GHLYST_12     | Gp 9  | <i>P. genheensis</i> Sun, Chang & Wu, 2015 | 50.72447° N 121.49123 E    | KU508149                 | +                | 33/012/33342                                            |
| GHLYST_13     | Gp 9  | <i>P. genheensis</i> Sun, Chang & Wu, 2015 | 50.72447° N 121.49123 E    | KU508150                 | +                | 33/012/33342                                            |

|             |       |                                            |                            |          |   |                  |
|-------------|-------|--------------------------------------------|----------------------------|----------|---|------------------|
| GHLYST_14   | Gp 9  | <i>P. genheensis</i> Sun, Chang & Wu, 2015 | 50.72447° N 121.49123 E    | KU508151 | + | 33/012/33342     |
| GHLYST_16   | Gp 9  | <i>P. genheensis</i> Sun, Chang & Wu, 2015 | 50.72447° N 121.49123 E    | KU508152 | + | 33/012/33342     |
| GHLYST_2    | Gp 9  | <i>P. genheensis</i> Sun, Chang & Wu, 2015 | 50.72447° N 121.49123 E    | KU508153 | + | 33/012/33342     |
| GHLYST_5    | Gp 9  | <i>P. genheensis</i> Sun, Chang & Wu, 2015 | 50.72447° N 121.49123 E    | KU508156 | + | 33/012/33342     |
| GHLYST_7    | Gp 9  | <i>P. genheensis</i> Sun, Chang & Wu, 2015 | 50.72447° N 121.49123 E    | KU508157 | + | 33/012/33342     |
| HHEJD_1     | Gp 15 | <i>P. zhangae</i> sp. nov.                 | 48.13709° N 119.76073° E   | KU508184 | + | 33/022/33342     |
| HHEJD_2     | Gp 15 | <i>P. zhangae</i> sp. nov.                 | 48.13709° N 119.76073° E   | KU508185 | + | 33/022/33342     |
| HHEJD_3     | Gp 15 | <i>P. zhangae</i> sp. nov.                 | 48.13709° N 119.76073° E   | KU508186 | + | 33/022/33342     |
| HHEJD_4     | Gp 15 | <i>P. zhangae</i> sp. nov.                 | 48.13709° N 119.76073° E   | KU508187 | + | 33/022/33342     |
| HHEJD_5     | Gp 15 | <i>P. zhangae</i> sp. nov.                 | 48.13709° N 119.76073° E   | KU508188 | + | 33/022/33342     |
| HHEJD_6     | Gp 15 | <i>P. zhangae</i> sp. nov.                 | 48.13709° N 119.76073° E   | KU508189 | + | 33/022/33342     |
| HHEJD_7     | Gp 15 | <i>P. zhangae</i> sp. nov.                 | 48.13709° N 119.76073° E   | KU508190 | + | 33/022/33342     |
| HHEJD_8     | Gp 15 | <i>P. zhangae</i> sp. nov.                 | 48.13709° N 119.76073° E   | KU508191 | + | 33/022/33342     |
| GMX_MES_4   | Gp 13 | ?                                          | 45.730317° N 126.647861° E | KU508170 | + | 33/022/33342     |
| GMX_MES_5   | Gp 13 | ?                                          | 45.730317° N 126.647861° E | KU508171 | + | 33/022/33342     |
| GMX_MES_6   | Gp 13 | ?                                          | 45.730317° N 126.647861° E | KU508172 | + | 33/022/33342     |
| GMX_MES_7   | Gp 13 | ?                                          | 45.730317° N 126.647861° E | KU508173 | + | 33/022/33342     |
| GMX_3       | Gp 10 | <i>P. cf. taimyrica</i> (Martynova, 1976)  | 47.14932° N 128.872301° E  | KU508160 | + | 33/01+22/33342   |
| GMX_4       | Gp 10 | <i>P. cf. taimyrica</i> (Martynova, 1976)  | 47.14932° N 128.872301° E  | KU508161 | + | 33/022/33342     |
| GMX_5       | Gp 10 | <i>P. cf. taimyrica</i> (Martynova, 1976)  | 47.14932° N 128.872301° E  | KU508162 | + | 33/022/33342     |
| GMX_6       | Gp 10 | <i>P. cf. taimyrica</i> (Martynova, 1976)  | 47.14932° N 128.872301° E  | KU508163 | + | 33/022/33342     |
| GMX_9       | Gp 10 | <i>P. cf. taimyrica</i> (Martynova, 1976)  | 47.14932° N 128.872301° E  | KU508166 | + | 33/022/33342     |
| GMX_8       | Gp 10 | <i>P. cf. taimyrica</i> (Martynova, 1976)  | 47.14932° N 128.872301° E  | KU508165 | + | 33/01+22/33342   |
| JHKYLD_2    | Gp 17 | ?                                          | 43.80567° N 127.17435° E   | KU508202 | - | -                |
| JHKYLD_3    | Gp 17 | ?                                          | 43.80567° N 127.17435° E   | KU508203 | - | -                |
| JHKYLD_4    | Gp 17 | ?                                          | 43.80567° N 127.17435° E   | KU508204 | + | 33+2/01+22/33342 |
| JHKYLD_9    | Gp 17 | ?                                          | 43.80567° N 127.17435° E   | KU508209 | + | 33/022/33342     |
| C0018_1     | Gp 4  | <i>P. jilinensis</i> sp. nov.              | 41.76° N 127.94° E         | KU508109 | + | 33/012/33342     |
| C0018_2     | Gp 4  | <i>P. jilinensis</i> sp. nov.              | 41.76° N 127.94° E         | KU508110 | + | 33/012/33342     |
| C0018_3     | Gp 4  | <i>P. jilinensis</i> sp. nov.              | 41.76° N 127.94° E         | KU508111 | + | 33/012/33342     |
| C0018_4     | Gp 4  | <i>P. jilinensis</i> sp. nov.              | 41.76° N 127.94° E         | KU508112 | + | 33/012/33342     |
| C0018_5     | Gp 4  | <i>P. jilinensis</i> sp. nov.              | 41.76° N 127.94° E         | KU508113 | - | -                |
| C0018_6     | Gp 4  | <i>P. jilinensis</i> sp. nov.              | 41.76° N 127.94° E         | KU508114 | + | 33/012/33342     |
| C0018_7     | Gp 4  | <i>P. jilinensis</i> sp. nov.              | 41.76° N 127.94° E         | KU508115 | + | 33/012/33342     |
| C0018_8     | Gp 4  | <i>P. jilinensis</i> sp. nov.              | 41.76° N 127.94° E         | KU508116 | + | 33/012/33342     |
| YTLHHJD_2   | Gp 22 | <i>P. cf. taimyrica</i> (Martynova, 1976)  | 50.69010° N 121.71912° E   | KU508233 | + | 33/022/33342     |
| YTLHHJD_3   | Gp 22 | <i>P. cf. taimyrica</i> (Martynova, 1976)  | 50.69010° N 121.71912° E   | KU508234 | - | -                |
| YTLHHJD_7   | Gp 22 | <i>P. cf. taimyrica</i> (Martynova, 1976)  | 50.69010° N 121.71912° E   | KU508238 | + | 33/022/33342     |
| YTLHHJD_8   | Gp 22 | <i>P. cf. taimyrica</i> (Martynova, 1976)  | 50.69010° N 121.71912° E   | KU508239 | + | 33/022/33342     |
| XINKAILINDI | Gp 20 | <i>P. khanka</i> sp. nov.                  | 45.373181° N 132.332138° E | KU508225 | - | -                |

|                     |       |                                                   |                            |          |   |              |
|---------------------|-------|---------------------------------------------------|----------------------------|----------|---|--------------|
| XKLD_1              | Gp 20 | <i>P. khanka</i> sp. nov.                         | 45.373181° N 132.332138° E | KU508226 | + | 33/012/33342 |
| XKLD_2              | Gp 20 | <i>P. khanka</i> sp. nov.                         | 45.373181° N 132.332138° E | KU508227 | + | 33/012/33342 |
| XKLD_3              | Gp 20 | <i>P. khanka</i> sp. nov.                         | 45.373181° N 132.332138° E | KU508228 | + | 33/012/33342 |
| XKLD_6              | Gp 20 | <i>P. khanka</i> sp. nov.                         | 45.373181° N 132.332138° E | KU508230 | + | 33/012/33342 |
| XKLD_5              | Gp 20 | <i>P. khanka</i> sp. nov.                         | 45.373181° N 132.332138° E | KU508229 | + | 33/012/33342 |
| HCGSHD_1            | Gp 14 | <i>P. liui</i> sp. nov.                           | 43.07765° N 128.01729° E   | KU508174 | - | -            |
| HCGSHD_2            | Gp 14 | <i>P. liui</i> sp. nov.                           | 43.07765° N 128.01729° E   | KU508176 | - | -            |
| HCGSHD_3            | Gp 14 | <i>P. liui</i> sp. nov.                           | 43.07765° N 128.01729° E   | KU508177 | + | 32/012/33232 |
| HCGSHD_4            | Gp 14 | <i>P. liui</i> sp. nov.                           | 43.07765° N 128.01729° E   | KU508178 | + | 32/012/33232 |
| HCGSHD_5            | Gp 14 | <i>P. liui</i> sp. nov.                           | 43.07765° N 128.01729° E   | KU508179 | + | 32/012/33232 |
| HCGSHD_6            | Gp 14 | <i>P. liui</i> sp. nov.                           | 43.07765° N 128.01729° E   | KU508180 | + | 32/012/33232 |
| HCGSHD_7            | Gp 14 | <i>P. liui</i> sp. nov.                           | 43.07765° N 128.01729° E   | KU508181 | - | -            |
| HCGSHD_8            | Gp 14 | <i>P. liui</i> sp. nov.                           | 43.07765° N 128.01729° E   | KU508182 | + | 32/012/33232 |
| HCGSHD_9            | Gp 14 | <i>P. liui</i> sp. nov.                           | 43.07765° N 128.01729° E   | KU508183 | + | 32/012/33232 |
| HCGSHD_10           | Gp 14 | <i>P. liui</i> sp. nov.                           | 43.07765° N 128.01729° E   | KU508175 | + | 32/012/33232 |
| 14SY_Protaphorura_4 | Gp 1  | <i>P. cf. changbaiensis</i> Sun, Zhang & Wu, 2013 | 41.85547° N 123.42595° E   | KU508099 | + | 32/012/33232 |
| 14SY_5_Protaphorura | Gp 1  | <i>P. cf. changbaiensis</i> Sun, Zhang & Wu, 2013 | 41.85547° N 123.42595° E   | KU508097 | + | 32/012/33232 |
| 14SY_6_Protaphorura | Gp 1  | <i>P. cf. changbaiensis</i> Sun, Zhang & Wu, 2013 | 41.85547° N 123.42595° E   | KU508098 | + | 32/012/33232 |
| JHKYLD_1            | Gp 16 | <i>P. jiaoheensis</i> sp. nov.                    | 43.80567° N 127.17435° E   | KU508200 | - | -            |
| JHKYLD_5            | Gp 16 | <i>P. jiaoheensis</i> sp. nov.                    | 43.80567° N 127.17435° E   | KU508205 | + | 32/012/33232 |
| JHKYLD_6            | Gp 16 | <i>P. jiaoheensis</i> sp. nov.                    | 43.80567° N 127.17435° E   | KU508206 | + | 32/012/33232 |
| JHKYLD_7            | Gp 16 | <i>P. jiaoheensis</i> sp. nov.                    | 43.80567° N 127.17435° E   | KU508207 | + | 32/012/33232 |
| JHKYLD_8            | Gp 16 | <i>P. jiaoheensis</i> sp. nov.                    | 43.80567° N 127.17435° E   | KU508208 | + | 32/012/33232 |
| JHKYLD_10           | Gp 16 | <i>P. jiaoheensis</i> sp. nov.                    | 43.80567° N 127.17435° E   | KU508201 | + | 32/012/33232 |
| CB_12_16_2          | Gp 5  | <i>P. changbaiensis</i> Sun, Zhang & Wu, 2013     | 42.270789° N 128.146863° E | KU508129 | - | -            |
| CB_12_16_3          | Gp 5  | <i>P. changbaiensis</i> Sun, Zhang & Wu, 2013     | 42.270789° N 128.146863° E | KU508130 | + | 32/012/33232 |
| CB_12_08_6          | Gp 5  | <i>P. changbaiensis</i> Sun, Zhang & Wu, 2013     | 42.270789° N 128.146863° E | KU508121 | - | -            |
| CB_12_09_1          | Gp 5  | <i>P. changbaiensis</i> Sun, Zhang & Wu, 2013     | 42.270789° N 128.146863° E | KU508122 | - | -            |
| CB_12_08_5          | Gp 5  | <i>P. changbaiensis</i> Sun, Zhang & Wu, 2013     | 42.270789° N 128.146863° E | KU508120 | - | -            |
| CB_12_08_4          | Gp 5  | <i>P. changbaiensis</i> Sun, Zhang & Wu, 2013     | 42.270789° N 128.146863° E | KU508119 | - | -            |
| CB_12_08_1          | Gp 5  | <i>P. changbaiensis</i> Sun, Zhang & Wu, 2013     | 42.270789° N 128.146863° E | KU508117 | - | -            |
| CB_12_08_3          | Gp 5  | <i>P. changbaiensis</i> Sun, Zhang & Wu, 2013     | 42.270789° N 128.146863° E | KU508118 | - | -            |
| CB_12_09_3          | Gp 5  | <i>P. changbaiensis</i> Sun, Zhang & Wu, 2013     | 42.270789° N 128.146863° E | KU508123 | - | -            |
| CB_12_09_4          | Gp 5  | <i>P. changbaiensis</i> Sun, Zhang & Wu, 2013     | 42.270789° N 128.146863° E | KU508124 | - | -            |
| CB_12_09_5          | Gp 5  | <i>P. changbaiensis</i> Sun, Zhang & Wu, 2013     | 42.270789° N 128.146863° E | KU508125 | - | -            |
| CB_12_09_6          | Gp 5  | <i>P. changbaiensis</i> Sun, Zhang & Wu, 2013     | 42.270789° N 128.146863° E | KU508126 | - | -            |
| CB_12_16_1          | Gp 5  | <i>P. changbaiensis</i> Sun, Zhang & Wu, 2013     | 42.270789° N 128.146863° E | KU508127 | + | 32/012/33232 |

|               |       |                                               |                            |          |   |                |
|---------------|-------|-----------------------------------------------|----------------------------|----------|---|----------------|
| CB_12_16_1_2  | Gp 5  | <i>P. changbaiensis</i> Sun, Zhang & Wu, 2013 | 42.270789° N 128.146863° E | KU508128 | - | -              |
| CB_12_16_3_2  | Gp 5  | <i>P. changbaiensis</i> Sun, Zhang & Wu, 2013 | 42.270789° N 128.146863° E | KU508131 | - | -              |
| CB_12_16_4    | Gp 5  | <i>P. changbaiensis</i> Sun, Zhang & Wu, 2013 | 42.270789° N 128.146863° E | KU508132 | - | -              |
| CB_12_16_4_2  | Gp 5  | <i>P. changbaiensis</i> Sun, Zhang & Wu, 2013 | 42.270789° N 128.146863° E | KU508133 | + | 32/012/33232   |
| CB_12_16_5    | Gp 5  | <i>P. changbaiensis</i> Sun, Zhang & Wu, 2013 | 42.270789° N 128.146863° E | KU508134 | + | 32/012/33232   |
| CB_12_16_6    | Gp 5  | <i>P. changbaiensis</i> Sun, Zhang & Wu, 2013 | 42.270789° N 128.146863° E | KU508135 | + | 32/012/33232   |
| GMX_MES_1     | Gp 12 | <i>P. maoerensis</i> Sun, Wu & Gao, 2013      | 45.730317° N 126.647861° E | KU508167 | + | 43/022/33353   |
| GMX_MES_2     | Gp 12 | <i>P. maoerensis</i> Sun, Wu & Gao, 2013      | 45.730317° N 126.647861° E | KU508168 | + | 43/022/33353   |
| GMX_MES_3     | Gp 12 | <i>P. maoerensis</i> Sun, Wu & Gao, 2013      | 45.730317° N 126.647861° E | KU508169 | + | 43/022/33353   |
| GMX_7         | Gp 11 | ?                                             | 47.14932° N 128.872301° E  | KU508164 | + | 33/022/33342   |
| GHLYST_1      | Gp 8  | <i>P. cf. kaszabi</i> (Dunger, 1978)          | 50.72447° N 121.49123 E    | KU508146 | + | 33/033/33342   |
| GHLYST_8      | Gp 8  | <i>P. cf. kaszabi</i> (Dunger, 1978)          | 50.72447° N 121.49123 E    | KU508158 | + | 33/033/33342   |
| GHLYST_3      | Gp 8  | <i>P. cf. kaszabi</i> (Dunger, 1978)          | 50.72447° N 121.49123 E    | KU508154 | - | -              |
| GHLYST_4      | Gp 8  | <i>P. cf. kaszabi</i> (Dunger, 1978)          | 50.72447° N 121.49123 E    | KU508155 | + | 33/033/33342   |
| GHLYST_9      | Gp 8  | <i>P. cf. kaszabi</i> (Dunger, 1978)          | 50.72447° N 121.49123 E    | KU508159 | + | 33/033/33342   |
| AESHGD_2      | Gp 3  | <i>P. cf. subarctica</i> Martynova, 1976      | 47.510519° N 120.635001° E | KU508102 | - | -              |
| AESHGD_3      | Gp 3  | <i>P. cf. subarctica</i> Martynova, 1976      | 47.510519° N 120.635001° E | KU508103 | - | -              |
| AESHGD_6      | Gp 3  | <i>P. cf. subarctica</i> Martynova, 1976      | 47.510519° N 120.635001° E | KU508105 | + | 32/022/33332   |
| AESHGD_7      | Gp 3  | <i>P. cf. subarctica</i> Martynova, 1976      | 47.510519° N 120.635001° E | KU508106 | + | 32/022/33332   |
| AESHGD_8      | Gp 3  | <i>P. cf. subarctica</i> Martynova, 1976      | 47.510519° N 120.635001° E | KU508107 | + | 32/022/33332   |
| AESHGD_9      | Gp 3  | <i>P. cf. subarctica</i> Martynova, 1976      | 47.510519° N 120.635001° E | KU508108 | + | 32/022/33332   |
| AESHGD_10     | Gp 3  | <i>P. cf. subarctica</i> Martynova, 1976      | 47.510519° N 120.635001° E | KU508101 | + | 32/022/33332   |
| LD_11_061_1   | Gp 19 | ?                                             | 49.058176° N 127.074391° E | KU508214 | + | 32/022/33342   |
| YTLHHJD_1     | Gp 21 | ?                                             | 50.69010° N 121.71912° E   | KU508231 | + | 32/022/33342   |
| YTLHHJD_4     | Gp 21 | ?                                             | 50.69010° N 121.71912° E   | KU508235 | + | 32/022/33342   |
| LD_11_061_4   | Gp 18 | ?                                             | 49.058176° N 127.074391° E | KU508217 | + | 33/022/33343   |
| LD_11_061_5   | Gp 18 | ?                                             | 49.058176° N 127.074391° E | KU508218 | + | 33/022/33343   |
| LD_11_060_1_2 | Gp 18 | ?                                             | 49.058176° N 127.074391° E | KU508210 | + | 33+2/022/33343 |
| LD_11_060_3_2 | Gp 18 | ?                                             | 49.058176° N 127.074391° E | KU508213 | + | 33/022/33343   |
| LD_11_061_2   | Gp 18 | ?                                             | 49.058176° N 127.074391° E | KU508215 | + | 33/022/33343   |
| LD_11_061_3   | Gp 18 | ?                                             | 49.058176° N 127.074391° E | KU508216 | + | 33/022/33343   |
| LD_11_061_6   | Gp 18 | ?                                             | 49.058176° N 127.074391° E | KU508219 | + | 33/022/33343   |

Note: "-" means that the skin of the specimen is missing after the molecular work; "vouchers" are the specimens which have been examined for pso formula; the character status of the deformities individuals are labeled in red.



**Table S4. Geographical distances between populations**

|                                     | 41.85547°<br>N | 42.270789°<br>N | 42.40093°<br>N | 43.07765°<br>N | 43.80567°<br>N | 45.373181°<br>N | 45.730317°<br>N | 47.14932°<br>N | 47.510519°<br>N | 47.719336°<br>N | 48.13709°<br>N | 49.058176°<br>N | 49.10684°<br>N | 50.12214°<br>N | 50.69010°<br>N | 50.72447°<br>N |           |
|-------------------------------------|----------------|-----------------|----------------|----------------|----------------|-----------------|-----------------|----------------|-----------------|-----------------|----------------|-----------------|----------------|----------------|----------------|----------------|-----------|
| 41.76°<br>N<br>127.94°<br>E         | 0              | 375.2228        | 59.2661        | 72.5163        | 146.5046       | 235.7253        | 535.6053        | 453.225        | 603.4338        | 861.9606        | 798.5158       | 957.5101        | 813.9275       | 1036.8216      | 1104.8637      | 1101.6065      | 1112.6491 |
| 41.85547°<br>N<br>123.42595°<br>E   | 375.2228       | 0               | 393.4059       | 391.6909       | 401.2019       | 375.2624        | 817.6359        | 502.4866       | 730.1119        | 666.1159        | 1033.3621      | 755.3163        | 849.5913       | 855.4244       | 951.8994       | 990.7264       | 996.9633  |
| 42.270789°<br>N<br>128.146863°<br>E | 59.2661        | 393.4059        | 0              | 14.8289        | 90.2583        | 188.0284        | 481.7154        | 402.7381       | 545.1643        | 830.6439        | 741.5229       | 925.8668        | 758.9756       | 1001.4223      | 1065.1972      | 1057.115       | 1068.5999 |
| 42.40093°<br>N<br>128.10677°<br>E   | 72.5163        | 391.6909        | 14.8289        | 0              | 75.5315        | 173.5357        | 473.5288        | 387.9466       | 531.1362        | 817.8451        | 731.3504       | 912.9922        | 744.2569       | 987.9941       | 1051.2229      | 1042.6513      | 1054.1741 |
| 43.07765°<br>N<br>128.01729°<br>E   | 146.5046       | 401.2019        | 90.2583        | 75.5315        | 0              | 105.8235        | 428.7606        | 314.2897       | 457.4672        | 759.6946        | 675.004        | 854.153         | 668.7266       | 925.278        | 984.5363       | 972.1035       | 983.9446  |
| 43.80567°<br>N<br>127.17435°<br>E   | 235.7253       | 375.2624        | 188.0284       | 173.5357       | 105.8235       | 0               | 444.9622        | 217.9024       | 394.5929        | 654.8299        | 661.3211       | 749.0161        | 583.9175       | 819.4683       | 879.2105       | 869.116        | 880.6563  |
| 45.373181°<br>N<br>132.332138°<br>E | 535.6053       | 817.6359        | 481.7154       | 473.5288       | 428.7606       | 444.9622        | 0               | 445.5408       | 331.8074        | 928.7167        | 277.9157       | 1007.0715       | 571.0959       | 1037.6714      | 1049.746       | 986.3541       | 1001.988  |
| 45.730317°<br>N<br>126.647861°<br>E | 453.225        | 502.4866        | 402.7381       | 387.9466       | 314.2897       | 217.9024        | 445.5408        | 0              | 232.5802        | 501.0828        | 574.2535       | 588.4599        | 371.3832       | 641.4851       | 685.31         | 661.7337       | 674.2903  |
| 47.14932°<br>N<br>128.872301°<br>E  | 603.4338       | 730.1119        | 545.1643       | 531.1362       | 457.4672       | 394.5929        | 331.8074        | 232.5802       | 0               | 623.6286        | 361.0133       | 692.954         | 250.9398       | 712.7343       | 718.6963       | 655.1743       | 670.675   |
| 47.510519°<br>N<br>120.635001°<br>E | 861.9606       | 666.1159        | 830.6439       | 817.8451       | 759.6946       | 654.8299        | 928.7167        | 501.0828       | 623.6286        | 0               | 972.6642       | 95.597          | 507.7395       | 189.3117       | 292.142        | 362.3491       | 362.8467  |
| 47.719336°<br>N<br>133.584393°      | 798.5158       | 1033.3621       | 741.5229       | 731.3504       | 675.004        | 661.3211        | 277.9157        | 574.2535       | 361.0133        | 972.6642        | 0              | 1032.6769       | 504.4225       | 1034.3544      | 1014.766       | 924.3283       | 940.8532  |

E

|                               |           |          |           |           |          |          |           |          |          |          |           |          |          |          |          |          |          |
|-------------------------------|-----------|----------|-----------|-----------|----------|----------|-----------|----------|----------|----------|-----------|----------|----------|----------|----------|----------|----------|
| 48.13709° N<br>119.76073° E   | 957.5101  | 755.3163 | 925.8668  | 912.9922  | 854.153  | 749.0161 | 1007.0715 | 588.4599 | 692.954  | 95.597   | 1032.6769 | 0        | 548.8587 | 107.8428 | 223.1246 | 317.4879 | 313.9279 |
| 49.058176° N<br>127.074391° E | 813.9275  | 849.5913 | 758.9756  | 744.2569  | 668.7266 | 583.9175 | 571.0959  | 371.3832 | 250.9398 | 507.7395 | 504.4225  | 548.8587 | 0        | 535.0407 | 510.4084 | 425.4637 | 441.7801 |
| 49.10684° N<br>119.74769° E   | 1036.8216 | 855.4244 | 1001.4223 | 987.9941  | 925.278  | 819.4683 | 1037.6714 | 641.4851 | 712.7343 | 189.3117 | 1034.3544 | 107.8428 | 535.0407 | 0        | 117.6509 | 225.9777 | 219.1975 |
| 50.12214° N<br>120.20458° E   | 1104.8637 | 951.8994 | 1065.1972 | 1051.2229 | 984.5363 | 879.2105 | 1049.746  | 685.31   | 718.6963 | 292.142  | 1014.766  | 223.1246 | 510.4084 | 117.6509 | 0        | 124.8323 | 113.353  |
| 50.69010° N<br>121.71912° E   | 1101.6065 | 990.7264 | 1057.115  | 1042.6513 | 972.1035 | 869.116  | 986.3541  | 661.7337 | 655.1743 | 362.3491 | 924.3283  | 317.4879 | 425.4637 | 225.9777 | 124.8323 | 0        | 16.5456  |
| 50.72447° N<br>121.49123° E   | 1112.6491 | 996.9633 | 1068.5999 | 1054.1741 | 983.9446 | 880.6563 | 1001.988  | 674.2903 | 670.675  | 362.8467 | 940.8532  | 313.9279 | 441.7801 | 219.1975 | 113.353  | 16.5456  | 0        |

Note: the unit of the number is kilometer (km).

**Table S5. The number of putative species delimited using different distance thresholds.**

| Morphospecies Group | Dorsal pso   | Number of pso on subcoxae 1 of legs I-III | Locality                                                                                                            | 10 km | 20 km | 50 km | 100 km | 200 km | 300 km | 400 km | 500 km |
|---------------------|--------------|-------------------------------------------|---------------------------------------------------------------------------------------------------------------------|-------|-------|-------|--------|--------|--------|--------|--------|
| MG1                 | 32/012/33232 | 1,0,0                                     | 41.85547° N 123.42595° E;<br>42.270789° N 128.146863° E;<br>43.07765° N 128.01729° E;<br>43.80567° N 127.17435° E   | 4     | 4     | 4     | 3      | 2      | 2      | 2      | 1      |
| MG2                 | 32/022/33332 | 1,1,1                                     | 47.510519° N 120.635001° E                                                                                          | 1     | 1     | 1     | 1      | 1      | 1      | 1      | 1      |
| MG3                 | 32/022/33342 | 1,1,1                                     | 49.058176° N 127.074391° E;<br>50.69010° N 121.71912° E                                                             | 2     | 2     | 2     | 2      | 2      | 2      | 2      | 1      |
| MG4                 | 33/012/33342 | 1,1,1                                     | 41.76° N 127.94° E;<br>50.69010° N 121.71912° E;<br>50.72447° N 121.49123° E;<br>45.373181° N 132.332138° E         | 4     | 3     | 3     | 3      | 3      | 3      | 3      | 3      |
| MG5                 | 33/022/33332 | 0,0,0                                     | 47.719336° N 133.584393° E;<br>47.510519° N 120.635001° E;<br>49.10684° N 119.74769° E;<br>50.12214° N 120.20458° E | 4     | 4     | 4     | 4      | 2      | 2      | 2      | 2      |

|                                  |              |       |                                                                                                                                                                                                                                          |    |    |    |    |    |    |    |    |
|----------------------------------|--------------|-------|------------------------------------------------------------------------------------------------------------------------------------------------------------------------------------------------------------------------------------------|----|----|----|----|----|----|----|----|
| MG6                              | 33/022/33342 | 1,1,1 | 42.40093° N 128.10677° E;<br>49.058176° N 127.074391° E;<br>50.12214° N 120.20458° E;<br>47.14932° N 128.872301° E;<br>45.730317° N 126.647861° E;<br>48.13709° N 119.76073° E;<br>43.80567° N 127.17435° E;<br>50.69010° N 121.71912° E | 8  | 8  | 8  | 8  | 6  | 2  | 2  | 1  |
| MG7                              | 33/022/33342 | 1,0,0 | 47.14932° N 128.872301° E                                                                                                                                                                                                                | 1  | 1  | 1  | 1  | 1  | 1  | 1  | 1  |
| MG8                              | 33/022/33343 | 1,1,1 | 49.058176° N 127.074391° E                                                                                                                                                                                                               | 1  | 1  | 1  | 1  | 1  | 1  | 1  | 1  |
| MG9                              | 33/033/33342 | 1,1,1 | 50.72447° N 121.49123° E                                                                                                                                                                                                                 | 1  | 1  | 1  | 1  | 1  | 1  | 1  | 1  |
| MG10                             | 43/022/33353 | 1,0,0 | 45.730317° N 126.647861° E                                                                                                                                                                                                               | 1  | 1  | 1  | 1  | 1  | 1  | 1  | 1  |
| Total number of putative species |              |       |                                                                                                                                                                                                                                          | 27 | 26 | 26 | 25 | 20 | 16 | 16 | 13 |

Note: the numbers in the table means that the number of putative species delimited using the distance thresholds 10, 20, 50, 100, 200, 300, 400, 500 kilometers respectively.

**Table S6. The main diagnostic characters of *Protaphoura* from northeast China.**

| Group | Species                                           | Dorsal pso   | Ventral psx               | A     | B   | C       | D          |
|-------|---------------------------------------------------|--------------|---------------------------|-------|-----|---------|------------|
| Gp 1  | <i>P. cf. changbaiensis</i> Sun, Zhang & Wu, 2013 | 32/012/33232 | 0/000/100001 <sup>m</sup> | 1,0,0 | 1+1 | absent  | parallel   |
| Gp 2  | <i>P. cf. bicampata</i> (Gisin, 1956)             | 33/022/33332 | 1/000/111100              | 0,0,0 | 2+2 | present | convergent |
| Gp 3  | <i>P. cf. subarctica</i> Martynova, 1976          | 32/022/33332 | 0/000/111101 <sup>m</sup> | 1,1,1 | 2+2 | absent  | convergent |
| Gp 4  | <i>P. jilinensis</i> sp. nov.                     | 33/012/33342 | 1/000/100001 <sup>m</sup> | 1,1,1 | 1+1 | absent  | parallel   |
| Gp 5  | <i>P. changbaiensis</i> Sun, Zhang & Wu, 2013     | 32/012/33232 | 0/000/100001 <sup>m</sup> | 1,0,0 | 1+1 | absent  | parallel   |
| Gp 6  | <i>P. uniseta</i> sp. nov.                        | 33/022/33342 | 1/000/111101 <sup>m</sup> | 1,1,1 | 1+1 | absent  | parallel   |
| Gp 7  | <i>P. cf. bicampata</i> (Gisin, 1956)             | 33/022/33332 | 1/000/110100              | 0,0,0 | 2+2 | present | convergent |
| Gp 8  | <i>P. cf. kaszabi</i> (Dunger, 1978)              | 33/033/33342 | 1/000/110001 <sup>m</sup> | 1,1,1 | 1+1 | absent  | parallel   |
| Gp 9  | <i>P. genheensis</i> Sun, Chang & Wu, 2015        | 33/012/33342 | 1/000/111101 <sup>m</sup> | 1,1,1 | 1+1 | absent  | parallel   |
| Gp 10 | <i>P. cf. taimyrica</i> (Martynova, 1976)         | 33/022/33342 | 1/000/110001 <sup>m</sup> | 1,1,1 | 1+1 | absent  | parallel   |
| Gp 11 | ?                                                 | 33/022/33342 | *                         | 1,0,0 | 1+1 | absent  | parallel   |

|       |                                           |              |                           |       |     |        |            |
|-------|-------------------------------------------|--------------|---------------------------|-------|-----|--------|------------|
| Gp 12 | <i>P. maoerensis</i> Sun, Wu & Gao, 2013  | 43/022/33353 | 1/000/110000              | 1,0,0 | 2+2 | absent | parallel   |
| Gp 13 | ?                                         | 33/022/33342 | 1/000/100001 <sup>m</sup> | 1,1,1 | 1+1 | absent | parallel   |
| Gp 14 | <i>P. liui</i> sp. nov.                   | 32/012/33232 | 1/000/100001 <sup>m</sup> | 1,0,0 | 1+1 | absent | parallel   |
| Gp 15 | <i>P. zhangae</i> sp. nov.                | 33/022/33342 | 1/000/110101 <sup>m</sup> | 1,1,1 | 1+1 | absent | parallel   |
| Gp 16 | <i>P. jiaoheensis</i> sp. nov.            | 32/012/33232 | 1/000/110001 <sup>m</sup> | 1,0,0 | 1+1 | absent | parallel   |
| Gp 17 | ?                                         | 33/022/33342 | 1/000/100001 <sup>m</sup> | 1,1,1 | 1+1 | absent | parallel   |
| Gp 18 | ?                                         | 33/022/33343 | *                         | 1,1,1 | *   | absent | parallel   |
| Gp 19 | ?                                         | 32/022/33342 | *                         | 1,1,1 | *   | absent | convergent |
| Gp 20 | <i>P. khanka</i> sp. nov.                 | 33/012/33342 | 1/000/100001 <sup>m</sup> | 1,1,1 | 2+2 | absent | parallel   |
| Gp 21 | ?                                         | 32/022/33342 | *                         | 1,1,1 | *   | absent | convergent |
| Gp 22 | <i>P. cf. taimyrica</i> (Martynova, 1976) | 33/022/33342 | 1/000/110001 <sup>m</sup> | 1,1,1 | 1+1 | absent | parallel   |

Note: 1. Question mark means that the species cannot be given a name according to the present specimens that we have; asterisk means that this character status cannot be verified by the present specimens that we have; the character status of the deformities individuals are not included here. 2. Legends: A. Number of pso on subcoxae I of legs I–III; B, Number of ventral mesothoracic chaetae; C, Chaeta s' on abdominal terga I–III and V; D, Straight lines passing through base of prespinal on abdominal tergum VI.

**Table S7. Comparison and variation of the two new species having dorsal pso formula as 33/012/33342 and ventral psx as 1/000/100001<sup>m</sup>.**

|                                                  | <i>Protaphorura jilinensis</i> sp. nov.<br>(20 specimens) | <i>Protaphorura khanka</i> sp. nov.<br>(20 specimens) |
|--------------------------------------------------|-----------------------------------------------------------|-------------------------------------------------------|
| Number of chaetae on Th. sternum II              | 1+1 (90%), 1+2 (10%)                                      | 2+2 (80%), 1+2 (10%), 1+1 (10%)                       |
| Number of chaetae on subcoxa 1 of leg II         | 7                                                         | 7 (70%), 6 (30%)                                      |
| Number of chaetae on subcoxa 1 of leg III        | 5 (50%), 6 (45%), 7 (5%)                                  | 5                                                     |
| Number of basal chaetae on tibiotarsi of leg I   | 3 (95%), 4 (5%)                                           | 3 (15%), 4 (85%)                                      |
| Number of basal chaetae on tibiotarsi of leg II  | 5                                                         | 5 (95%), 4 (5%)                                       |
| Number of basal chaetae on tibiotarsi of leg III | 4                                                         | 4 (95%), 3 (5%)                                       |
| Number of axial chaeta m0 on Abd. tergum IV      | 1 (60%), 2 (40%)                                          | 1 (85%), 2 (15%)                                      |
| Axial chaeta m0 on Abd. tergum V                 | present (40%), absent (60%)                               | present (60%), absent (40%)                           |
